# Supplementary material for: Unraveling the effect of alkali cations on Fe single atom catalysts with high coordination numbers
Source: Royal Society of Chemistry journal article supplement (doi:10.1039/d5sc00581g), 2025-01-01
Supplement: d5sc00581g1.pdf [file d5sc00581g1.pdf]

## Unraveling the Effect of Alkali Cation on Fe Single Atom Catalyst with High Coordination Number

Yecheng Li<sup>§a</sup>, Songjie Meng<sup>§b</sup>, Zihong Wang<sup>c</sup>, Hehe Zhang<sup>d</sup>, Xin Zhao<sup>c</sup>, Qingshun Nian<sup>c</sup>, Digen Ruan<sup>c</sup>, Lianfeng Zou<sup>\*d</sup>, Zhansheng Lu<sup>\*b,e</sup>, and Xiaodi Ren<sup>\*a,c</sup>

<sup>a</sup> Y. Li, Prof. X. Ren

Hefei National Laboratory for Physical Sciences at the Microscale, CAS Key Laboratory of Materials for Energy Conversion, University of Science and Technology of China, Anhui 230026, China.

<sup>b</sup> S. Meng, Prof. Z. Lu

School of Physics, Henan Normal University, Xinxiang 453007, China.

<sup>c</sup> Z. Wang, X. Zhao, Q. Nian, D. Ruan, Prof. X. Ren

School of Chemistry and Materials Science, University of Science and Technology of China, Anhui 230026, China.

<sup>d</sup> H. Zhang, Prof. L. Zou

Clean Nano Energy Center, State Key Laboratory of Metastable Material Science and Technology, Yanshan University, Qinhuangdao, 066004 China.

<sup>e</sup> Prof. Z. Lu

College of Mathematics and Physics, Beijing University of Chemical Technology,  
Beijing 100029, China.

\*Corresponding author

E-mail address: [zoulf@ysu.edu.cn](mailto:zoulf@ysu.edu.cn), [zslu@buct.edu.cn](mailto:zslu@buct.edu.cn), [xdren@ustc.edu.cn](mailto:xdren@ustc.edu.cn)

## Figures and Tables

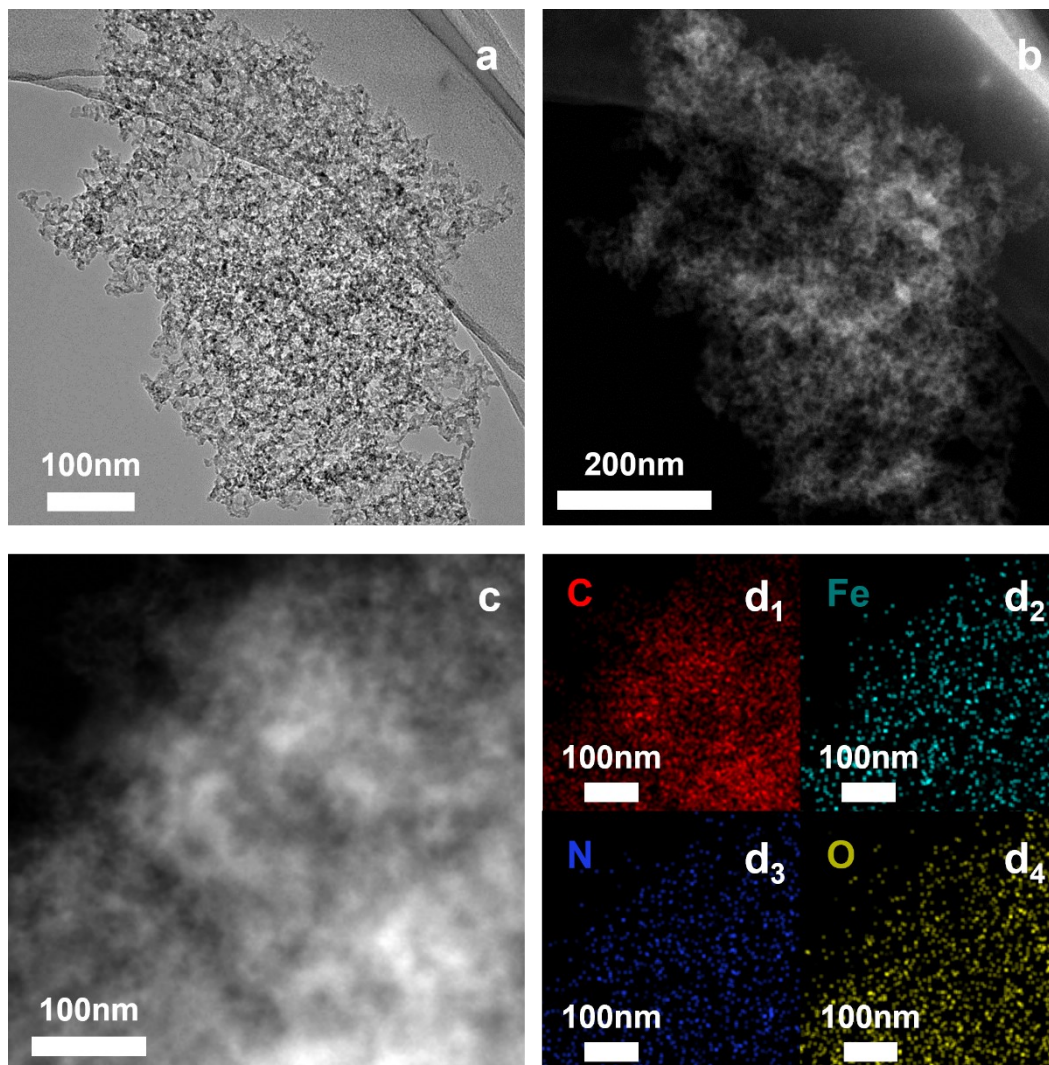

**Figure S1.** (a) The TEM image of FeN<sub>6</sub>. (b) – (c) HADDF-STEM image of FeN<sub>6</sub>. (d) EDS mapping image of FeN<sub>6</sub>, corresponding to C, Fe, N, and O element.

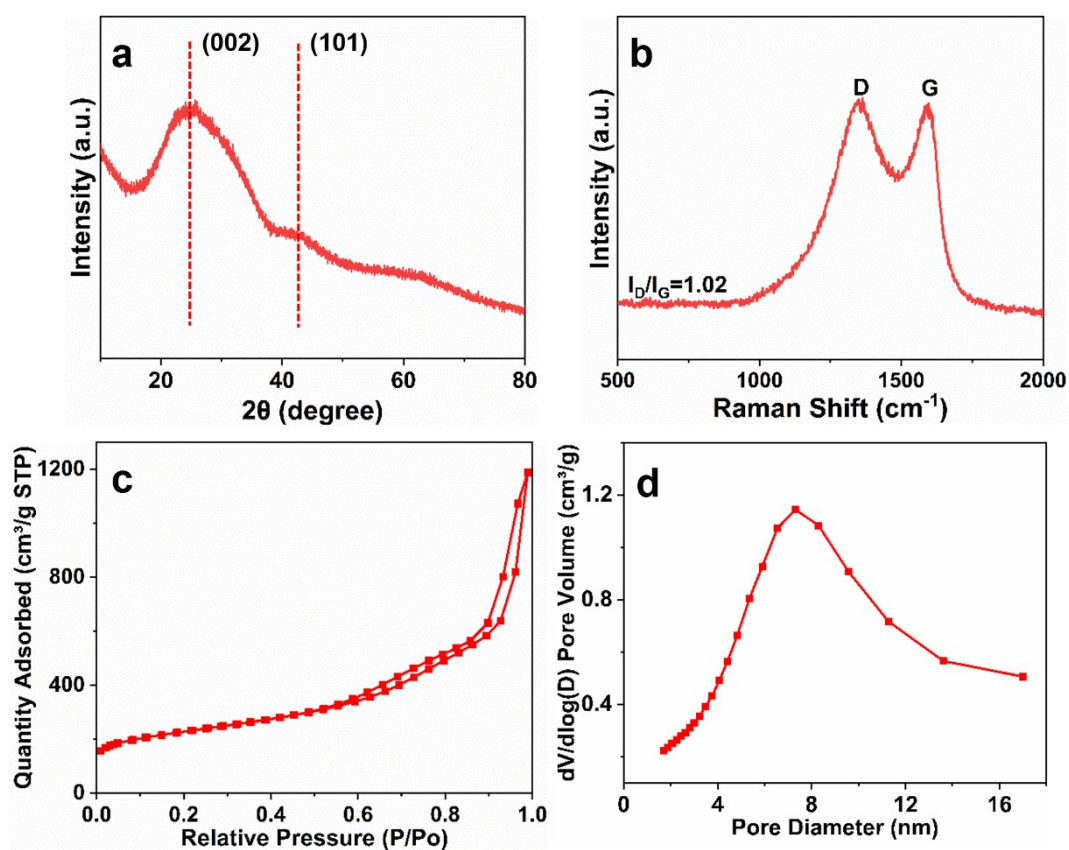

**Figure S2.** (a) The XRD image of FeN<sub>6</sub>. (b) The Raman image of FeN<sub>6</sub>. (c) The N<sub>2</sub> adsorption/desorption isotherms of FeN<sub>6</sub>. (d) The pore size distribution of FeN<sub>6</sub>.

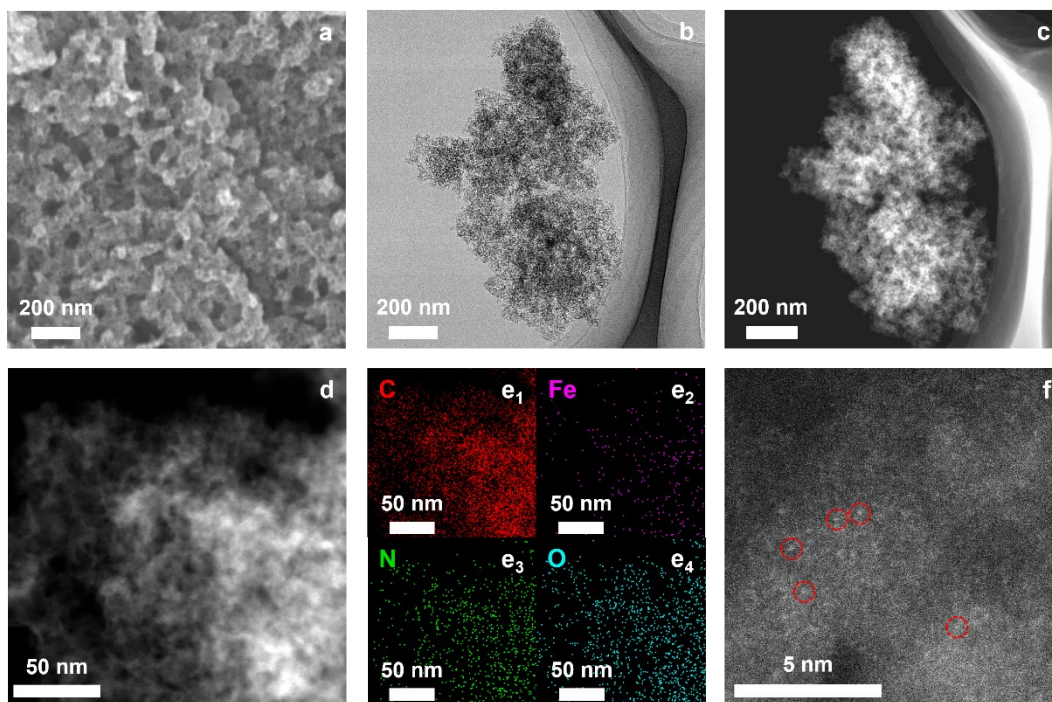

**Figure S3.** The morphology of catalyst. (a) SEM image of FeN<sub>5</sub>. (b) TEM image of FeN<sub>5</sub>. (c) - (d) HADDF-STEM image of FeN<sub>5</sub>. (e<sub>1</sub>) – (e<sub>4</sub>) EDS mapping image of FeN<sub>5</sub>, corresponding to C, Fe, N, and O element. (f) AC-HADDF-STEM image of FeN<sub>5</sub> (red circles are the Fe single atom sites).



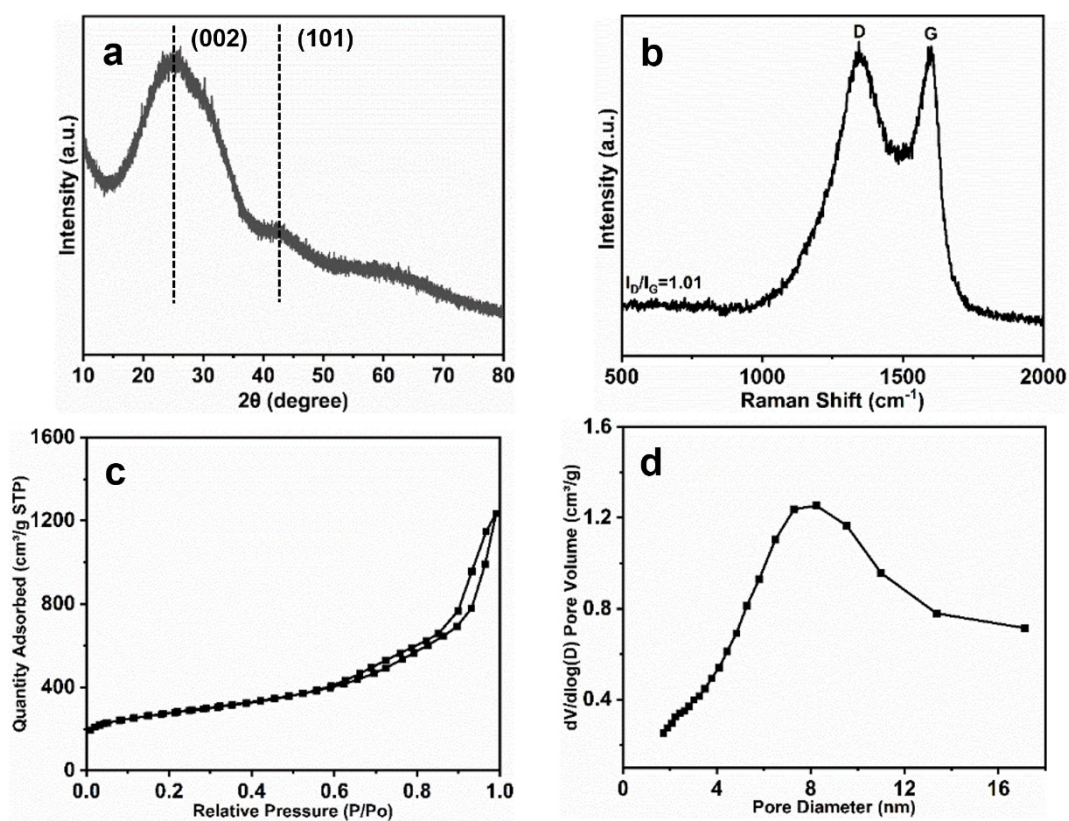

**Figure S4.** (a) The XRD image of FeN<sub>5</sub>. (b) The Raman image of FeN<sub>5</sub>. (c) The N<sub>2</sub> adsorption/desorption isotherms of FeN<sub>5</sub>. (d) The pore size distribution of FeN<sub>5</sub>.

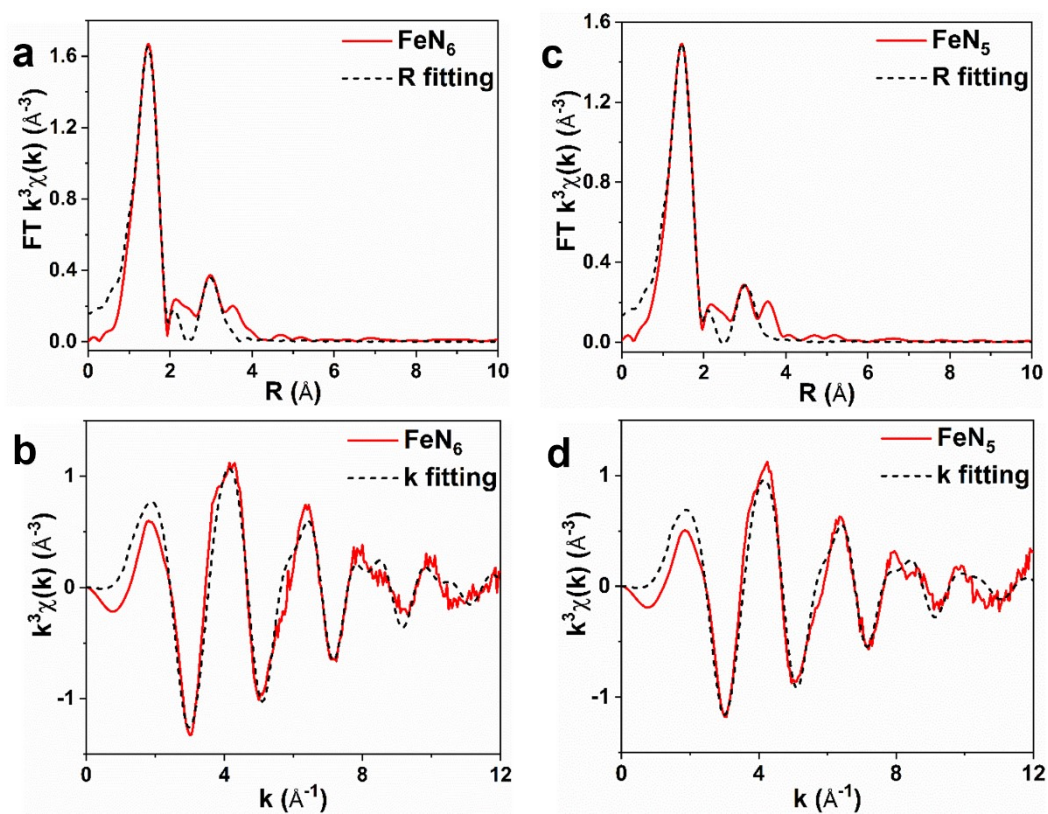

**Figure S5.** FT-EXAFS fitting curves of Fe k-edge  $\text{FeN}_5$  and  $\text{FeN}_6$ , related to Figure 2. (a) - (b) FT-EXAFS fitting curves at  $R$  spaces. (c) - (d) FT-EXAFS fitting curves at  $k$  spaces.

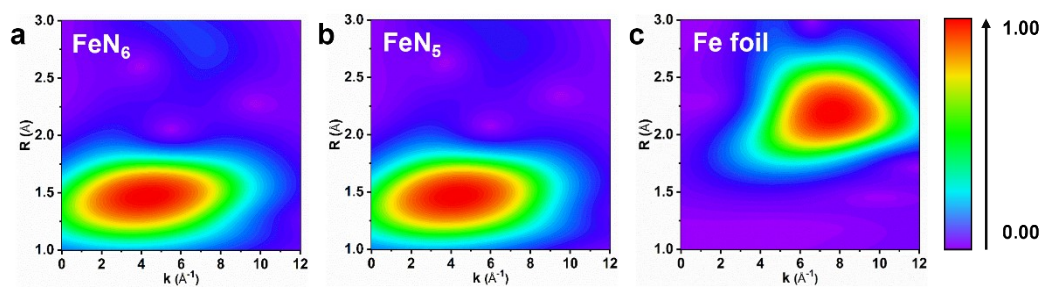

**Figure S6.** The WT-EXAFS spectra of (a)  $\text{FeN}_6$ , (b)  $\text{FeN}_5$  and (c) Fe foil.



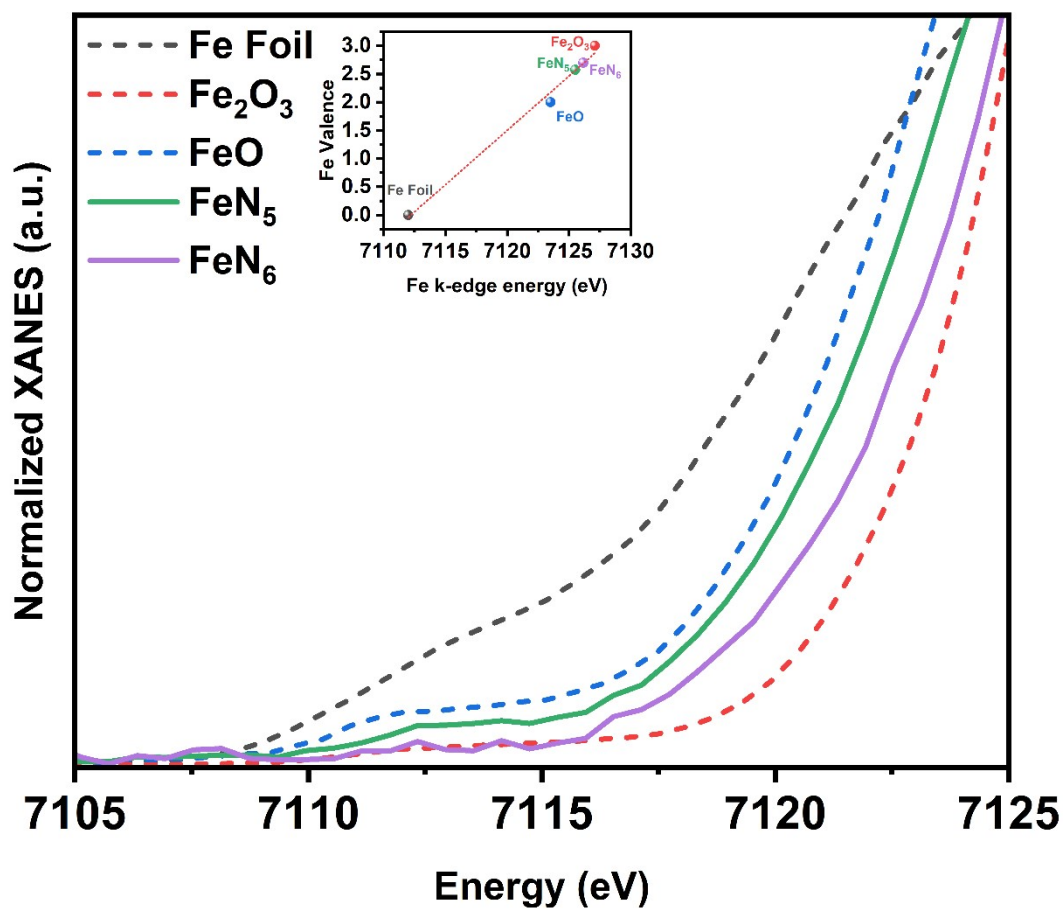

**Figure S7.** Fe K-edge XANES spectra and Fe valence state.

the valence state of Fe in FeN<sub>5</sub> and FeN<sub>6</sub> can be calculated to be 2.58 and 2.70 respectively. This result is consistent with our XPS analysis (Table S3), which shows that the valence state of Fe in FeN<sub>x</sub> is between +2 and +3, and the valence state of Fe in FeN<sub>6</sub> is higher than FeN<sub>5</sub>.

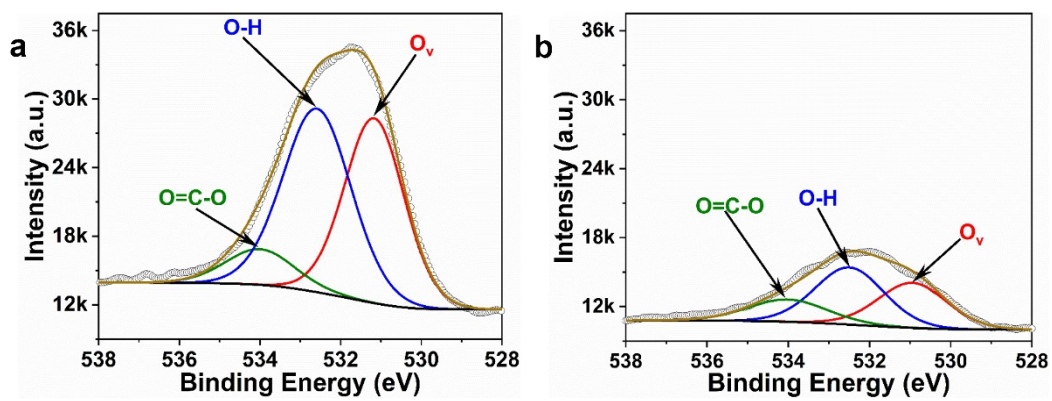

**Figure S8.** (a) The O spectrum of FeN<sub>6</sub>. (b) The O spectrum of FeN<sub>5</sub>.

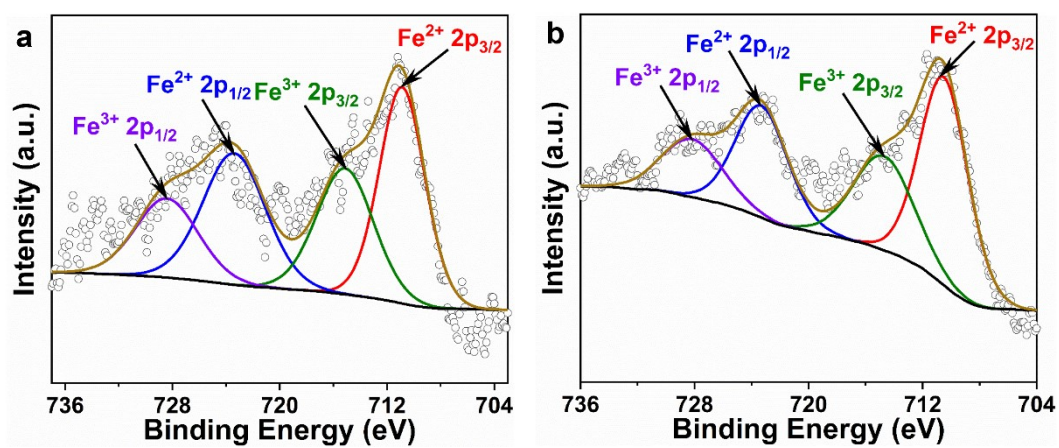

Figure S9. (a) The Fe spectrum of FeN<sub>6</sub>. (d) The Fe spectrum of FeN<sub>5</sub>.

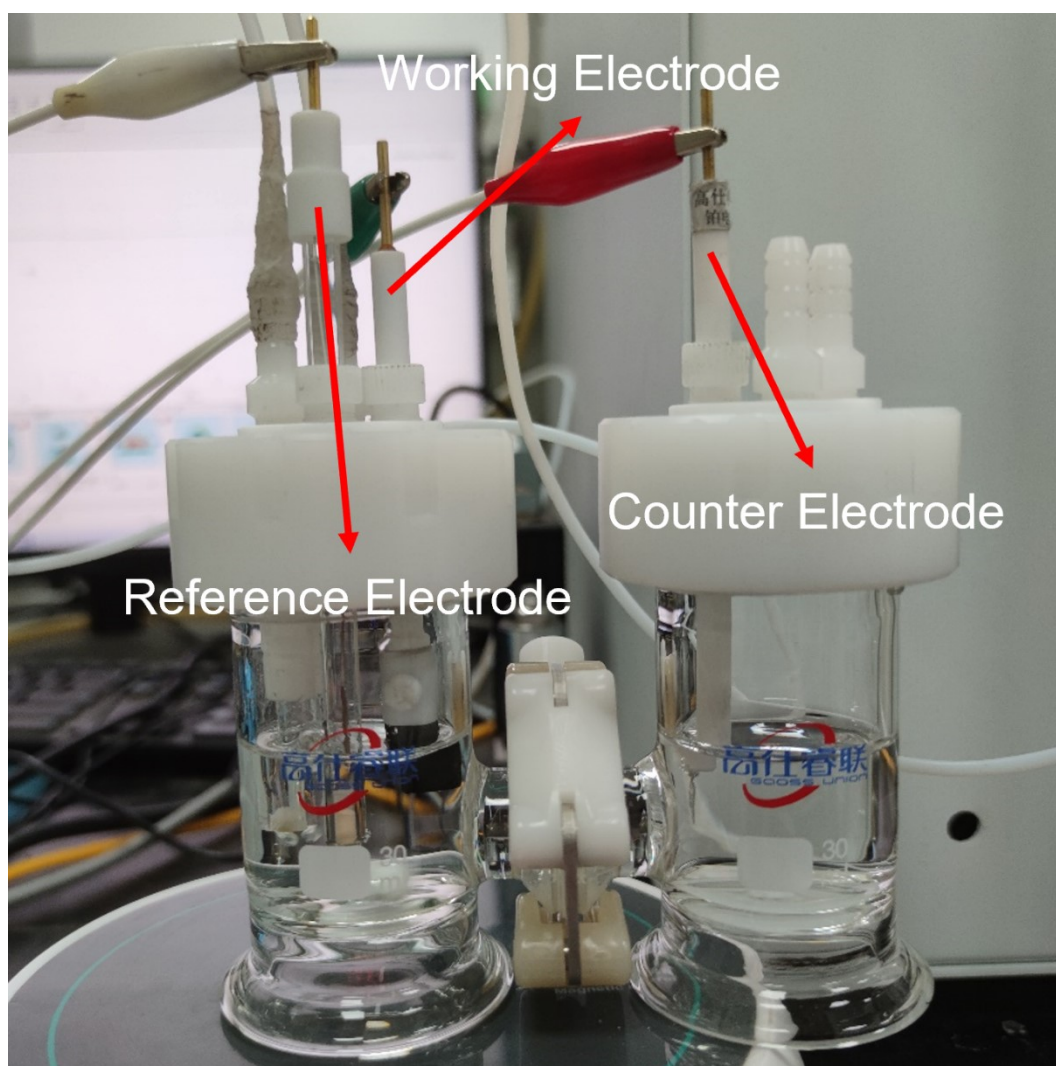

**Figure S10.** The H-type three-electrode system cell for electrochemical measurement.

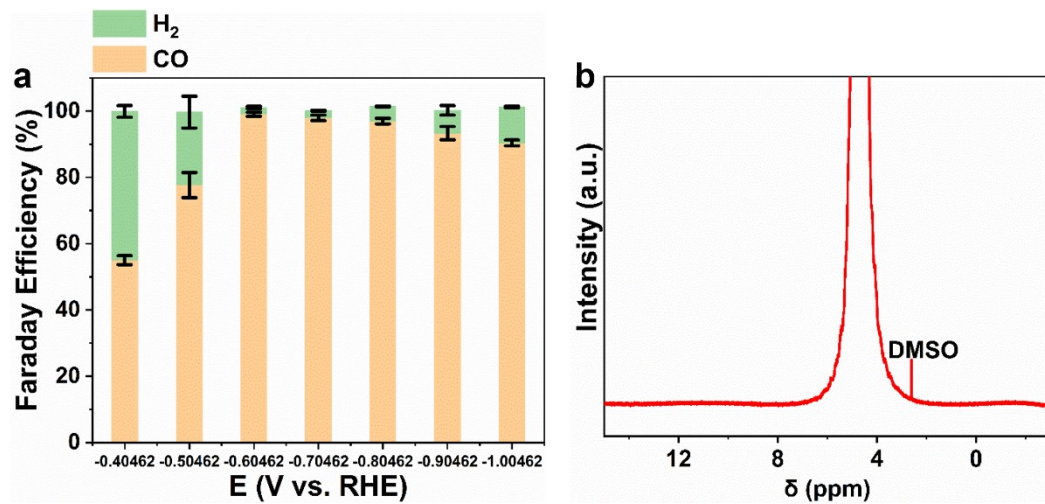

**Figure S11.** The selectivity of FeN<sub>6</sub>. (a) The total FE in 0.1 M NaHCO<sub>3</sub>. (b) The <sup>1</sup>H NMR spectroscopy in 0.1 M NaHCO<sub>3</sub> (After all selectivity tests).



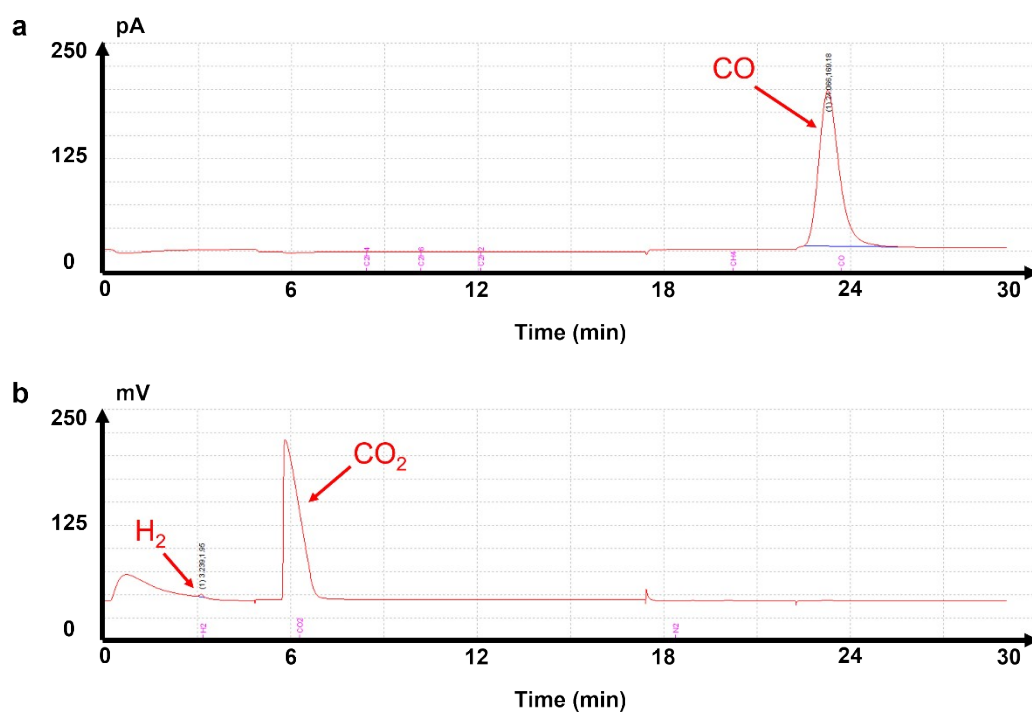

**Figure S12.** The GC of FeN<sub>6</sub> in CO<sub>2</sub> atmosphere (0.1 M RbHCO<sub>3</sub>, -0.60 V vs. RHE).  
 (a) The FID curve. (b) The TCD curve.

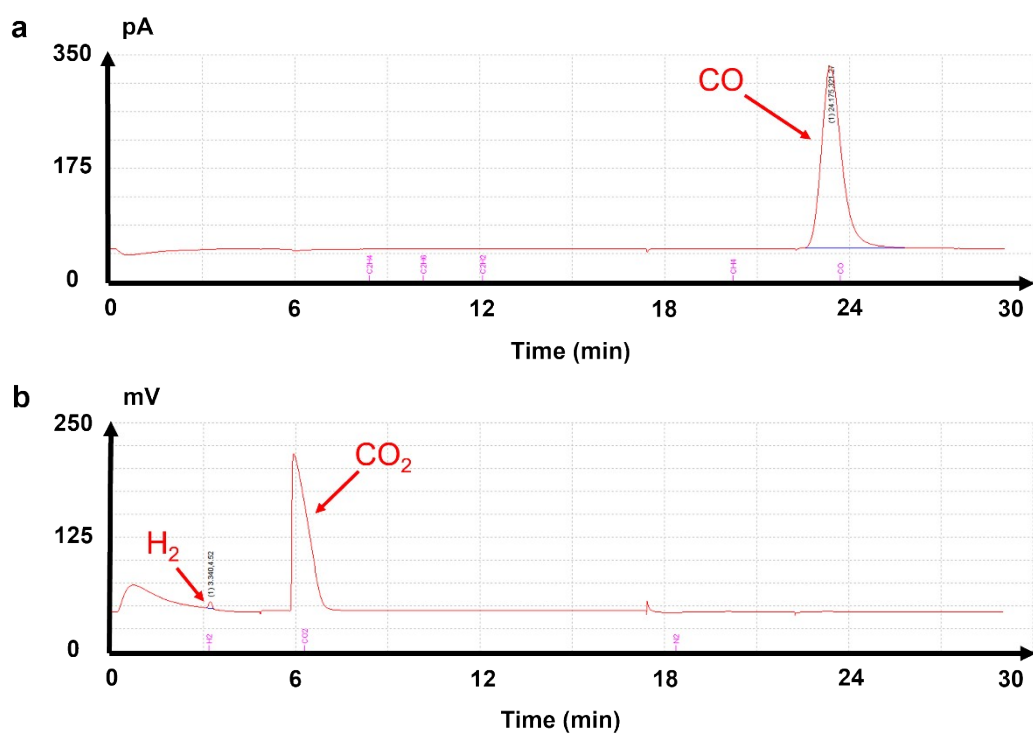

**Figure S13.** The GC of FeN<sub>5</sub> in CO<sub>2</sub> atmosphere (0.1 M RbHCO<sub>3</sub>, -0.60 V vs. RHE).  
(a) The FID curve. (b) The TCD curve.

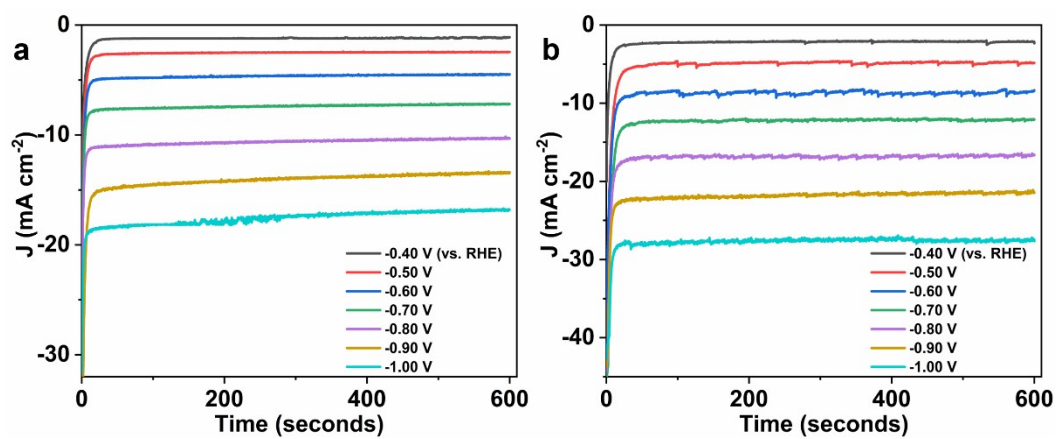

**Figure S14.** The I-t curves in 0.1 M RbHCO<sub>3</sub>. (a) The FeN<sub>6</sub> SAC. (b) The FeN<sub>5</sub> SAC.

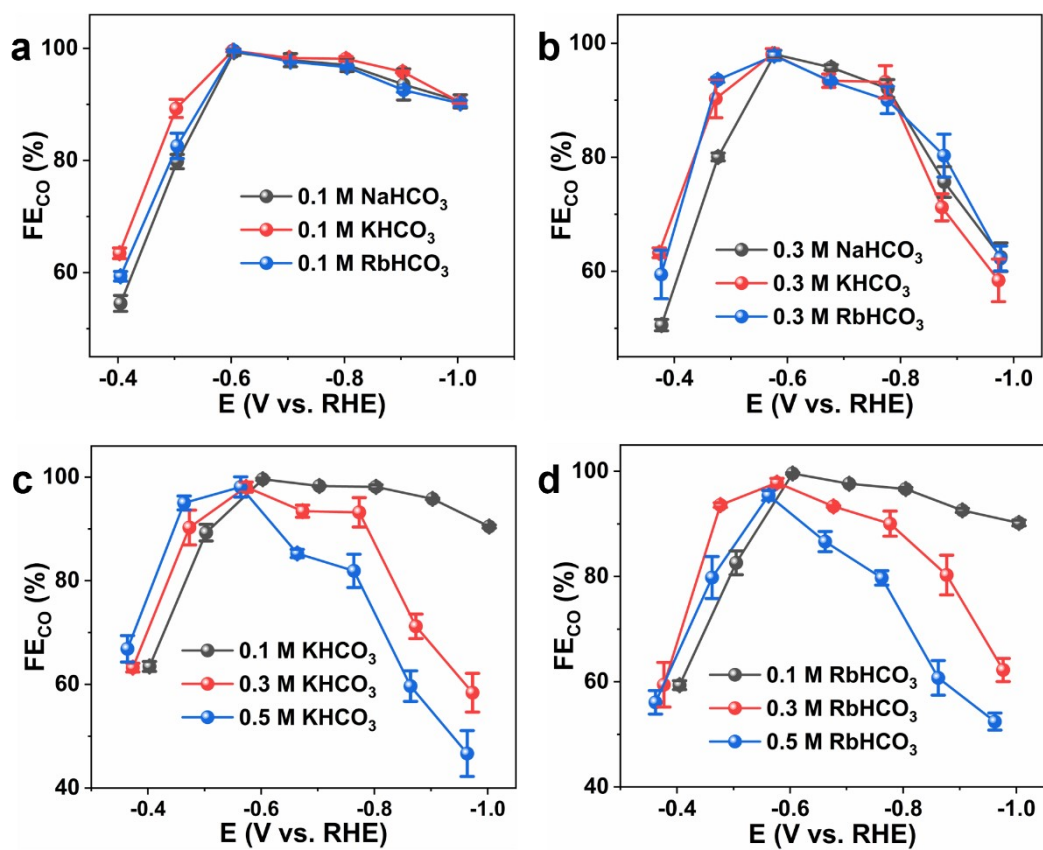

**Figure S15.** The FE<sub>CO</sub> of FeN<sub>6</sub> in different electrolyte. (a) 0.1 M and (b) 0.3 M with different cation. (c) KHCO<sub>3</sub> and (d) RbHCO<sub>3</sub> with different concentration.

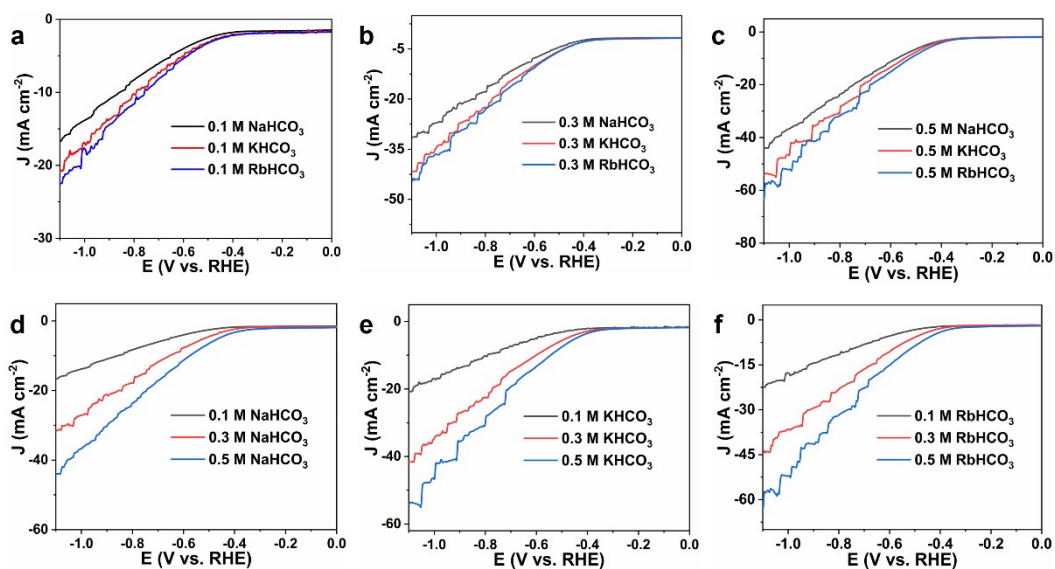

**Figure S16.** The LSV curves of FeN<sub>6</sub> in different electrolyte. (a) - (c) 0.1 M, 0.3M, and 0.5 M with different cation. (d) – (f) NaHCO<sub>3</sub>, KHCO<sub>3</sub>, and RbHCO<sub>3</sub> in different concentration respectively.



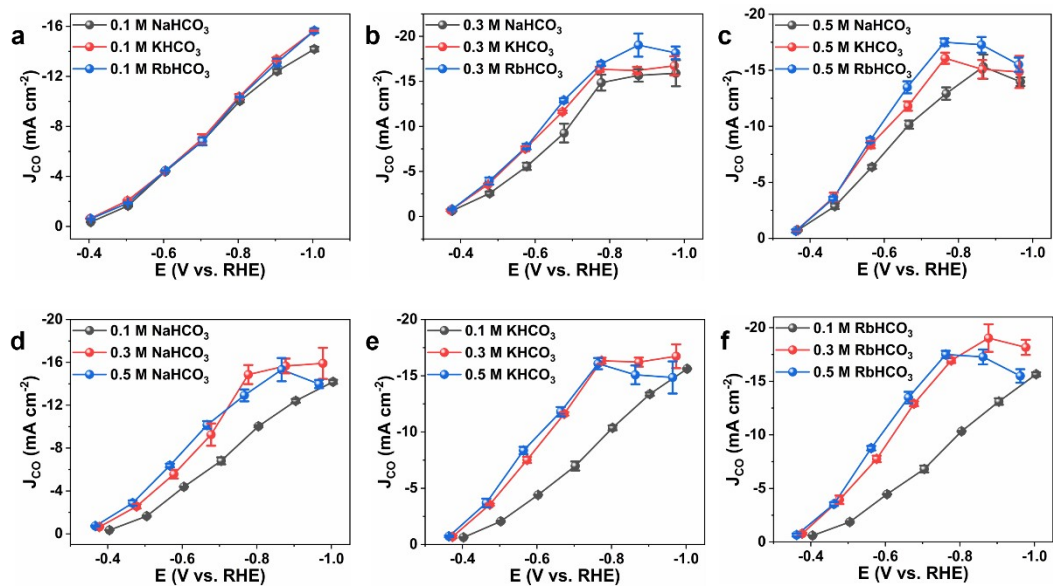

**Figure S17.** The  $J_{CO}$  of  $\text{FeN}_6$  in different electrolyte. (a) - (c) 0.1 M, 0.3M, and 0.5 M with different cation. (d) – (f)  $\text{NaHCO}_3$ ,  $\text{KHCO}_3$ , and  $\text{RbHCO}_3$  in different concentration respectively.

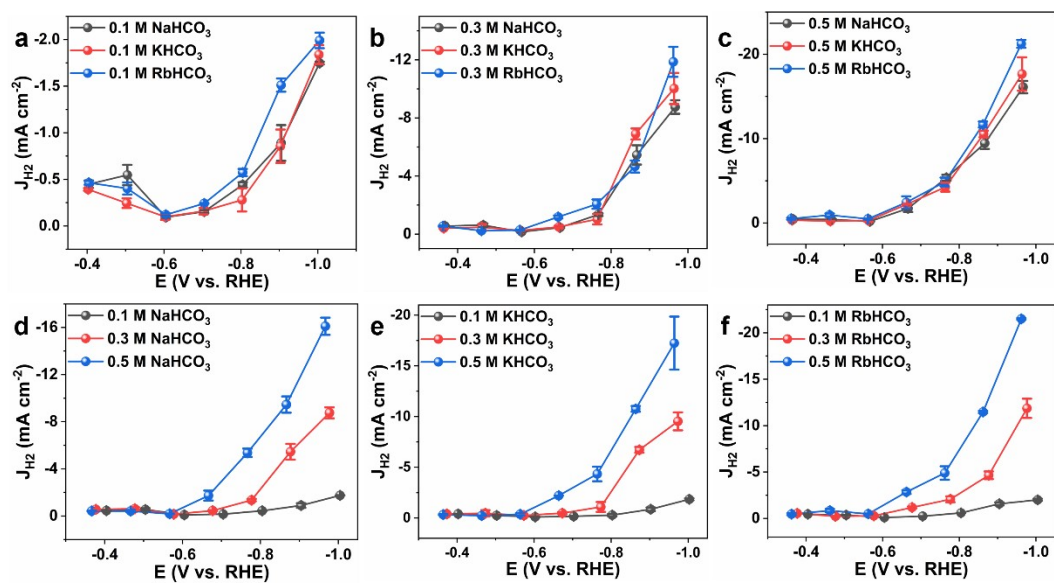

**Figure S18.** The  $J_{H_2}$  of  $\text{FeN}_6$  in different electrolyte. (a) - (c) 0.1 M, 0.3M, and 0.5 M with different cation. (d) – (f)  $\text{NaHCO}_3$ ,  $\text{KHCO}_3$ , and  $\text{RbHCO}_3$  in different concentration respectively.

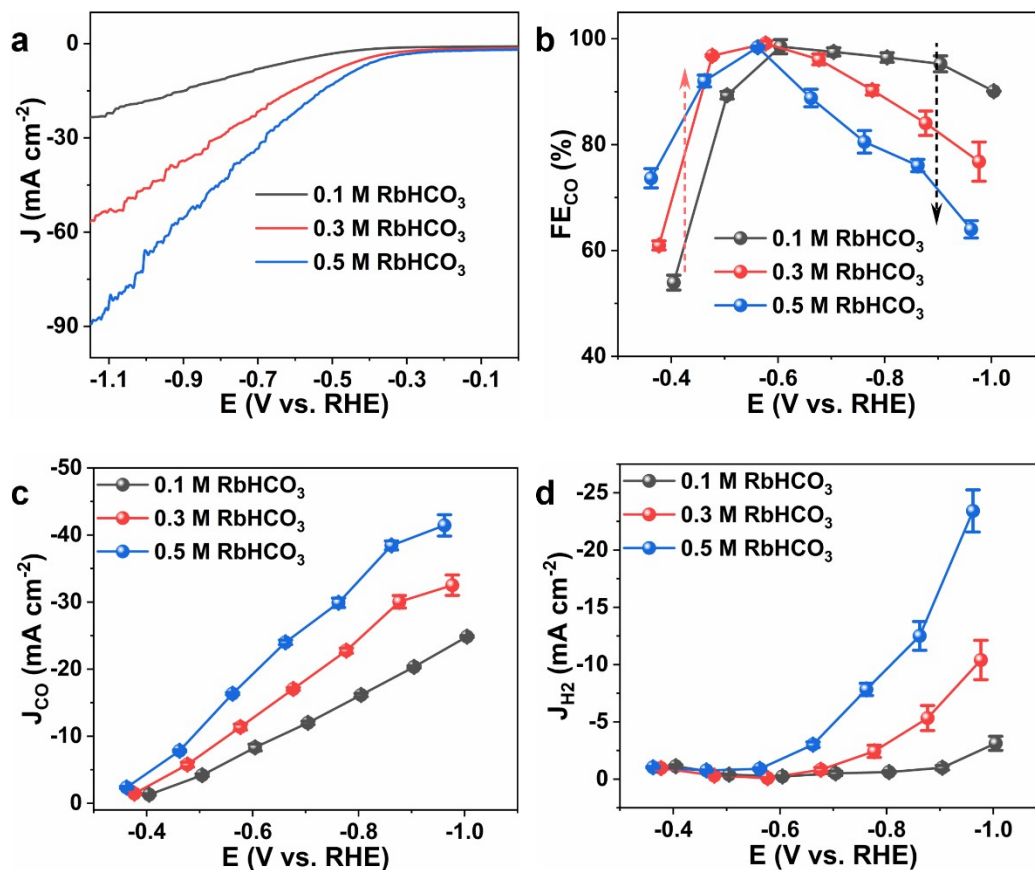

**Figure S19.** The performance of FeN<sub>5</sub> with different concentration. (a) The LSV curves of FeN<sub>5</sub> in RbHCO<sub>3</sub>. (b) The FE<sub>CO</sub> of FeN<sub>5</sub> in RbHCO<sub>3</sub>. (c) The J<sub>CO</sub> of FeN<sub>5</sub> in RbHCO<sub>3</sub>. (d) The J<sub>H2</sub> of FeN<sub>5</sub> in RbHCO<sub>3</sub>.

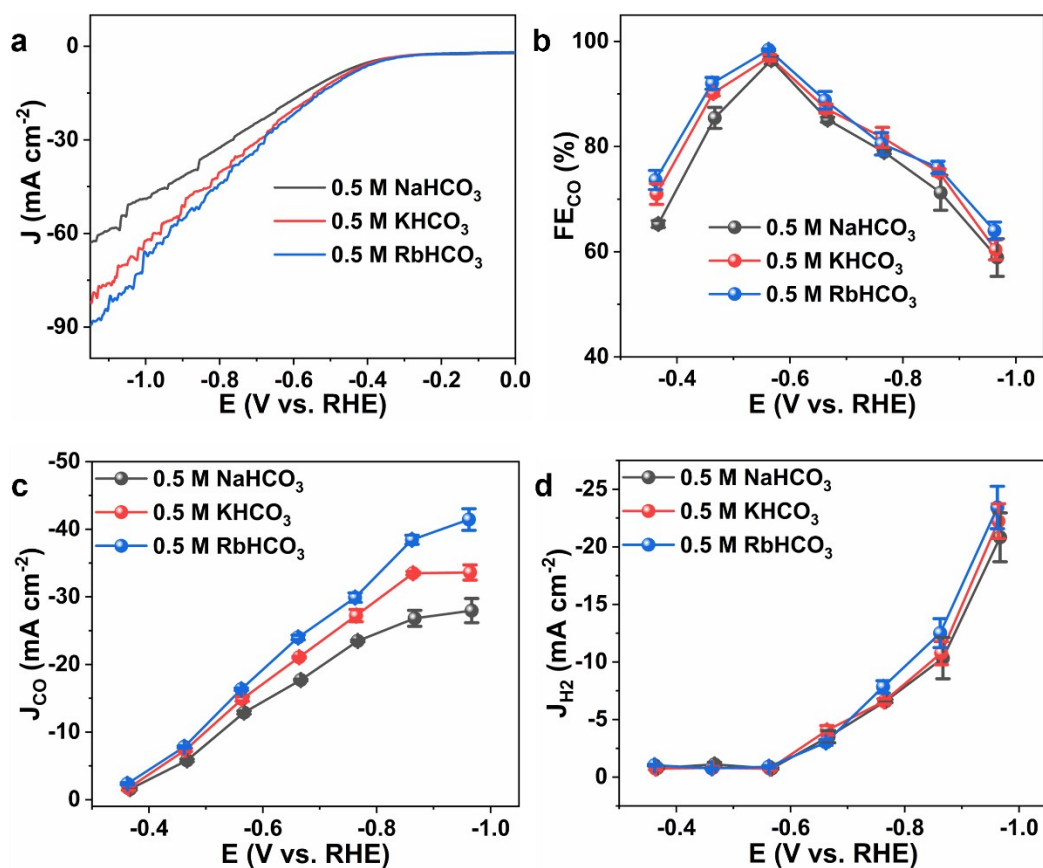

**Figure S20.** The performance of FeN<sub>5</sub> with different cation. (a) The LSV curves of FeN<sub>5</sub> in 0.5 M. (b) The FE<sub>CO</sub> of FeN<sub>5</sub> in 0.5 M. (c) The J<sub>CO</sub> of FeN<sub>5</sub> in 0.5 M. (d) The J<sub>H2</sub> of FeN<sub>5</sub> in 0.5 M.

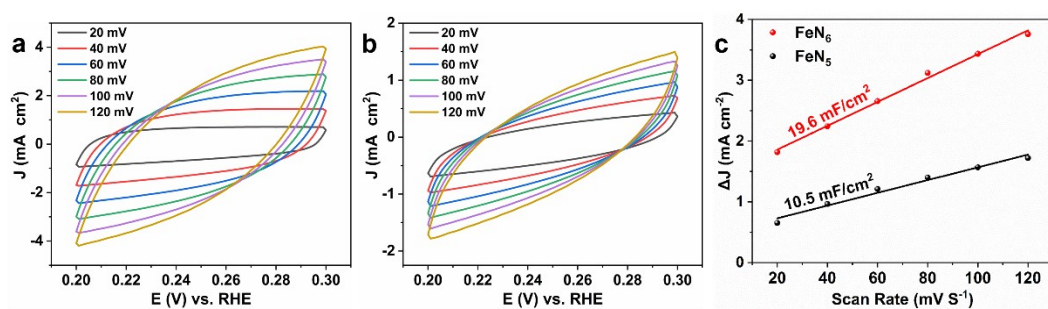

**Figure S21.** Cyclic voltammetry curves for (a) FeN<sub>6</sub> and (b) FeN<sub>5</sub> with the scan rate from 20mV/s ~ 120mV/s. (c) The  $C_{dl}$  for FeN<sub>6</sub> and FeN<sub>5</sub>.



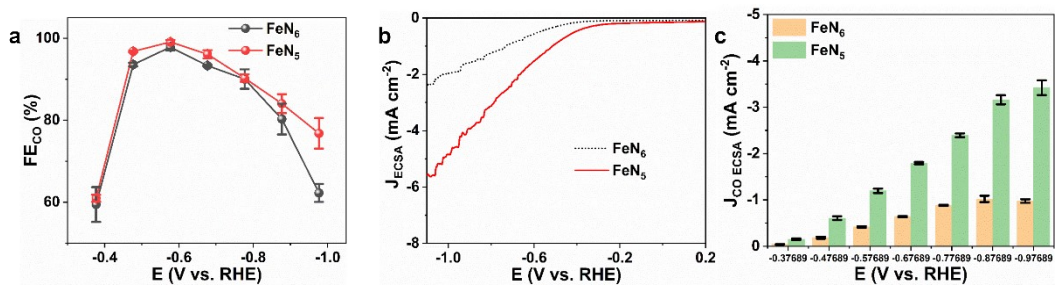

**Figure S22.** The performance comparison between FeN<sub>5</sub> and FeN<sub>6</sub> in 0.3 M RbHCO<sub>3</sub> (the current density is normalized by ECSA, Figure S20). (a) The FE<sub>CO</sub>. (b) The LSV curves. (c) The J<sub>CO</sub>.

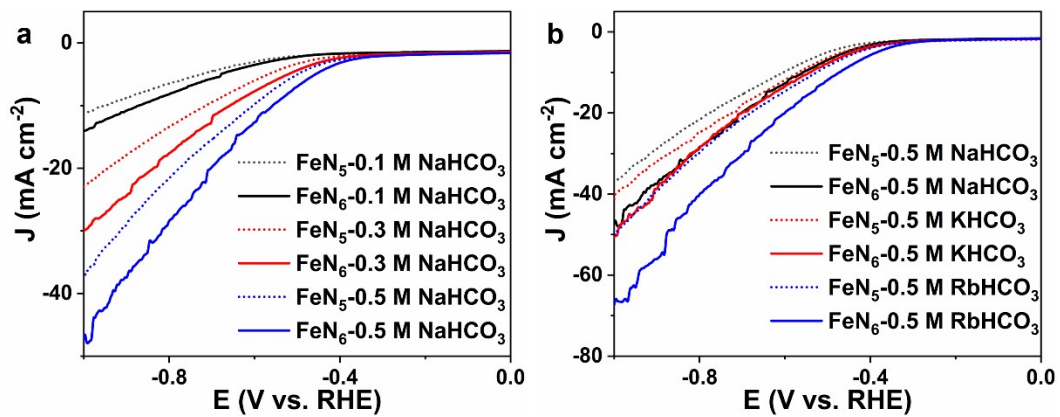

**Figure S23.** The LSV curves of FeN<sub>5</sub> and FeN<sub>6</sub> in Ar atmosphere with different electrolyte. (a) Different concentration. (b) Different cations.

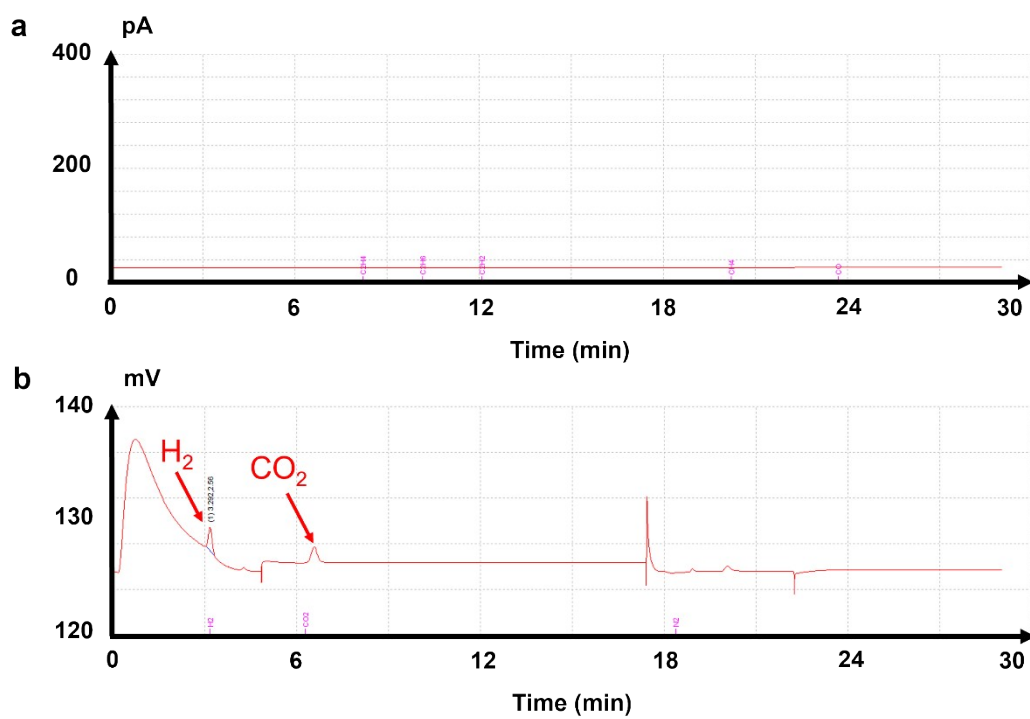

**Figure S24.** The GC of FeN<sub>6</sub> in Ar atmosphere (0.1 M RbHCO<sub>3</sub>, -0.60 V vs. RHE). (a) The FID curve. (b) The TCD curve.

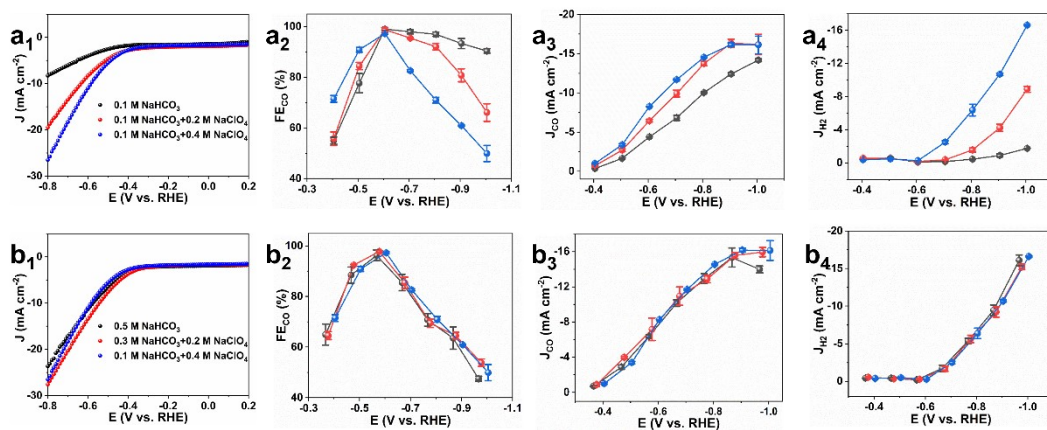

**Figure S25.** The CO<sub>2</sub> electroreduction performance of FeN<sub>6</sub> in constant cation and anion concentration. (a<sub>1</sub>) The LSV, (a<sub>2</sub>) FE<sub>CO</sub>, (a<sub>3</sub>) J<sub>CO</sub> and (a<sub>4</sub>) J<sub>H2</sub> in constant concentration of HCO<sub>3</sub><sup>-</sup>. (b<sub>1</sub>) The LSV, (b<sub>2</sub>) FE<sub>CO</sub>, (b<sub>3</sub>) J<sub>CO</sub> and (b<sub>4</sub>) J<sub>H2</sub> in constant concentration of Na<sup>+</sup>.

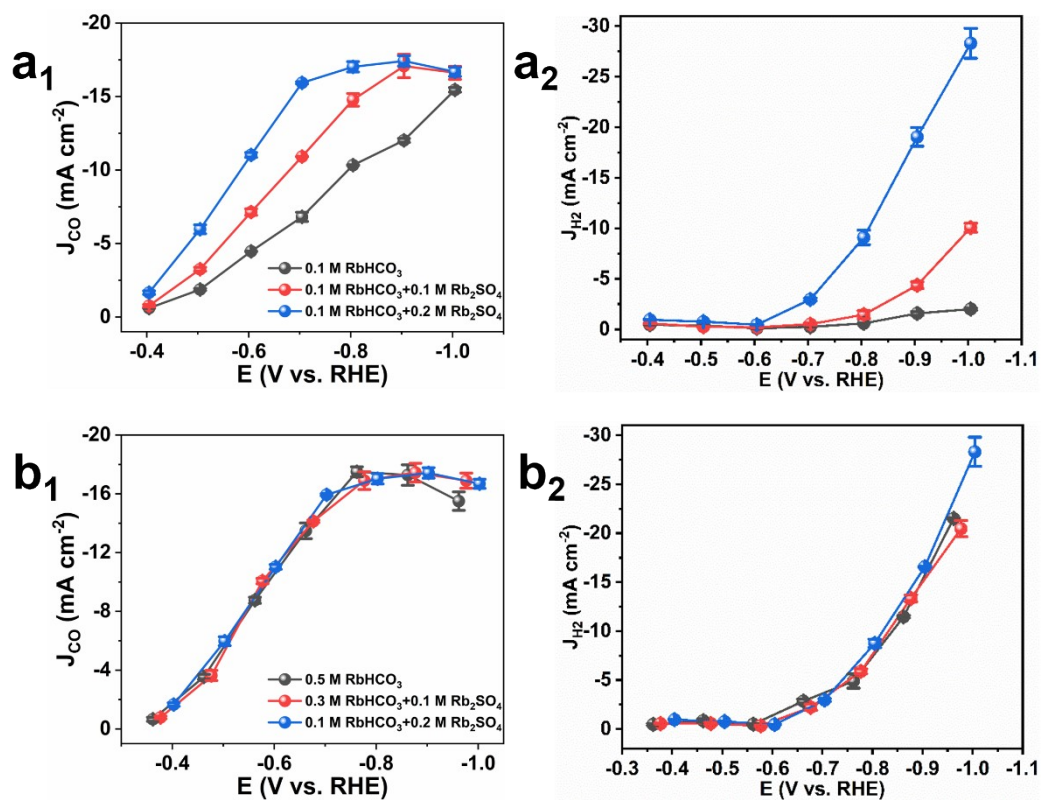

**Figure S26.** The CO<sub>2</sub> electroreduction performance of FeN<sub>6</sub> in constant cation and anion concentration. (a<sub>1</sub>) J<sub>CO</sub> and (a<sub>2</sub>) J<sub>H<sub>2</sub></sub> in constant concentration of HCO<sub>3</sub><sup>-</sup>. (b<sub>1</sub>) J<sub>CO</sub> and (b<sub>2</sub>) J<sub>H<sub>2</sub></sub> in constant concentration of Rb<sup>+</sup>.

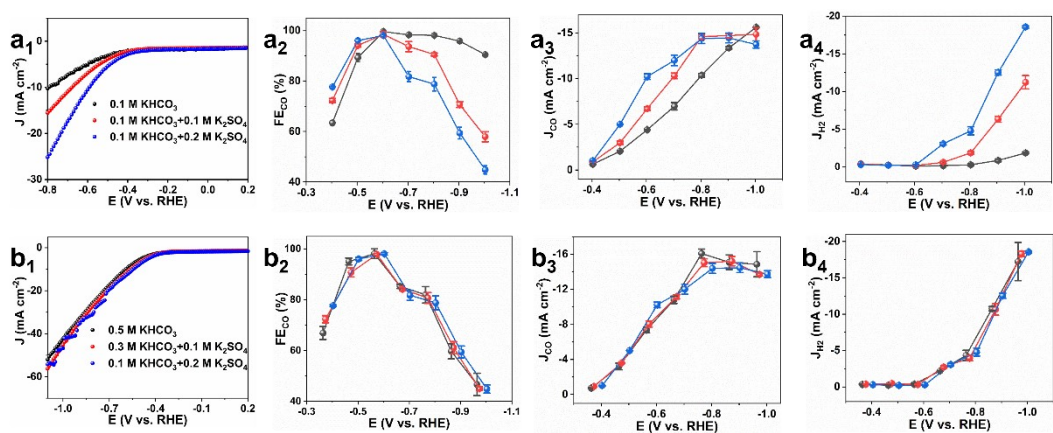

**Figure S27.** The CO<sub>2</sub> electroreduction performance of FeN<sub>6</sub> in constant cation and anion concentration. (a<sub>1</sub>) The LSV, (a<sub>2</sub>) FE<sub>CO</sub>, (a<sub>3</sub>) J<sub>CO</sub> and (a<sub>4</sub>) J<sub>H<sub>2</sub></sub> in constant concentration of HCO<sub>3</sub><sup>-</sup>. (b<sub>1</sub>) The LSV, (b<sub>2</sub>) FE<sub>CO</sub>, (b<sub>3</sub>) J<sub>CO</sub> and (b<sub>4</sub>) J<sub>H<sub>2</sub></sub> in constant concentration of K<sup>+</sup>.

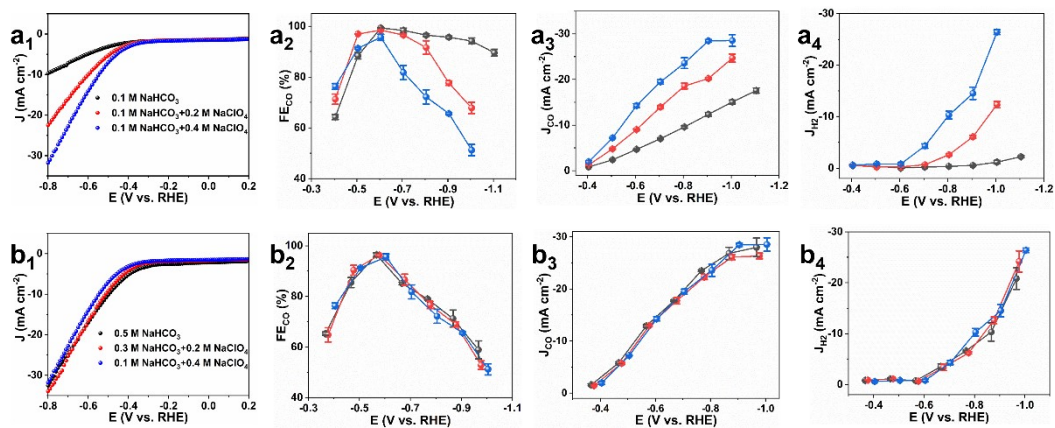

**Figure S28.** The CO<sub>2</sub> electroreduction performance of FeN<sub>5</sub> in constant cation and anion concentration. (a<sub>1</sub>) The LSV, (a<sub>2</sub>) FE<sub>CO</sub>, (a<sub>3</sub>) J<sub>CO</sub> and (a<sub>4</sub>) J<sub>H<sub>2</sub></sub> in constant concentration of HCO<sub>3</sub><sup>-</sup>. (b<sub>1</sub>) The LSV, (b<sub>2</sub>) FE<sub>CO</sub>, (b<sub>3</sub>) J<sub>CO</sub> and (b<sub>4</sub>) J<sub>H<sub>2</sub></sub> in constant concentration of Na<sup>+</sup>.



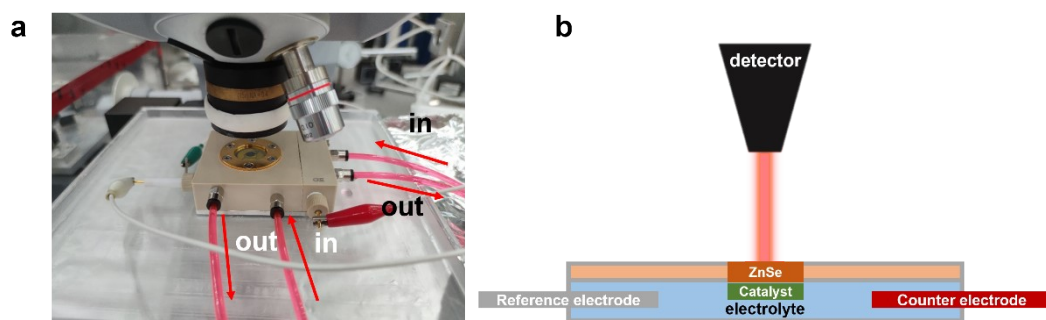

**Figure S29.** (a) The experimental setup for *in situ* SR-FTIR measurement. (b) The schematic of electrochemical cell for *in situ* SR-FTIR measurement.

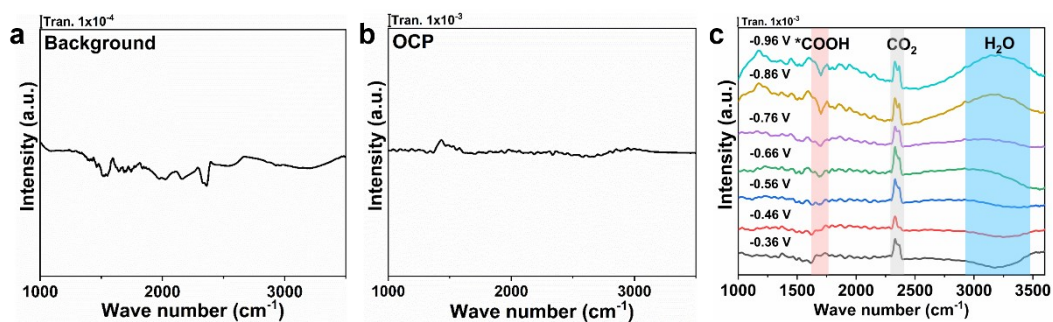

**Figure S30.** The *in-situ* SR-FTIR spectrum of FeN<sub>6</sub>. (a) The background spectrum. (b) The OCP spectrum. (c) The spectrum at different potential (0.5 M NaHCO<sub>3</sub>). The peak around 1700 cm<sup>-1</sup>, 2360 cm<sup>-1</sup> and 3150 cm<sup>-1</sup> belong to \*COOH, CO<sub>2</sub> and H<sub>2</sub>O respectively, \* denotes the adsorption site.<sup>1-2</sup>

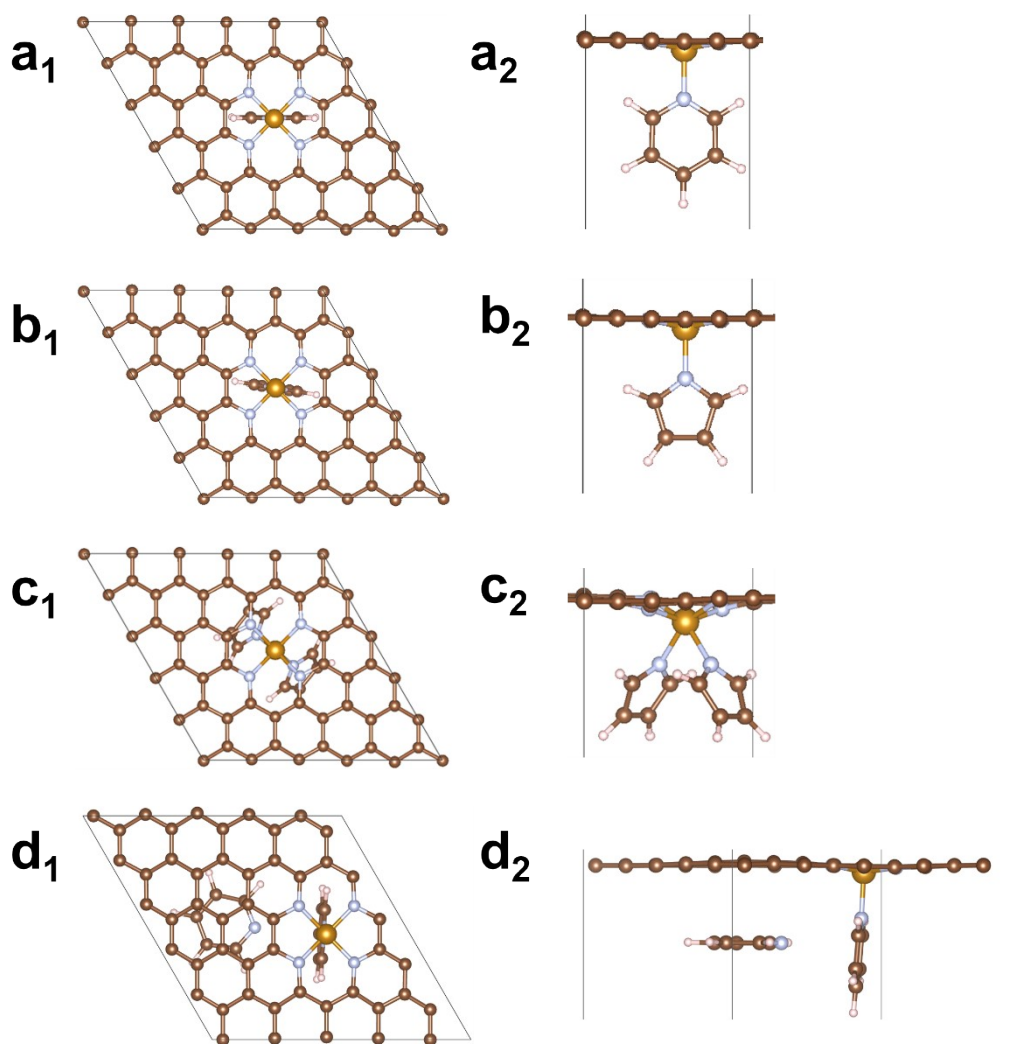

**Figure S31.** The top and side view of (a<sub>1</sub>)-(a<sub>2</sub>) FeN<sub>5</sub> (FeN<sub>4</sub> + pyridinic N), (b<sub>1</sub>)-(b<sub>2</sub>) FeN<sub>5</sub> (FeN<sub>4</sub> + pyrrolic N), (c<sub>1</sub>)-(c<sub>2</sub>) FeN<sub>6</sub> (FeN<sub>4</sub> + double pyrrolic N), (d<sub>1</sub>)-(d<sub>2</sub>) FeN<sub>6</sub> (FeN<sub>4</sub> + double pyridinic N).

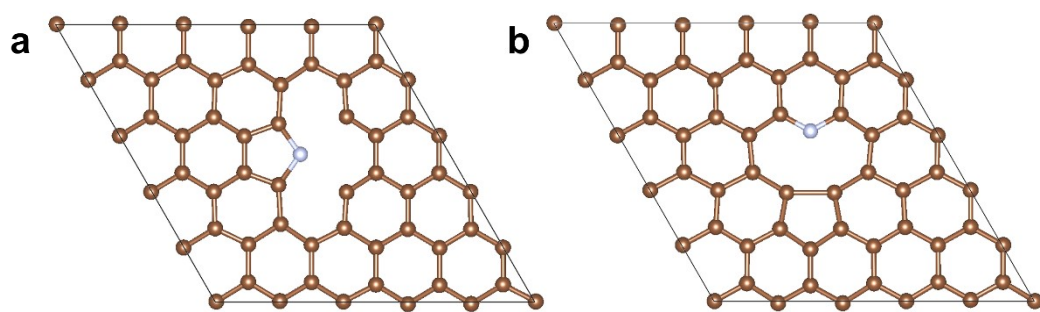

**Figure S32.** The top view of (a) pyrrolic N and (b) pyridinic N.

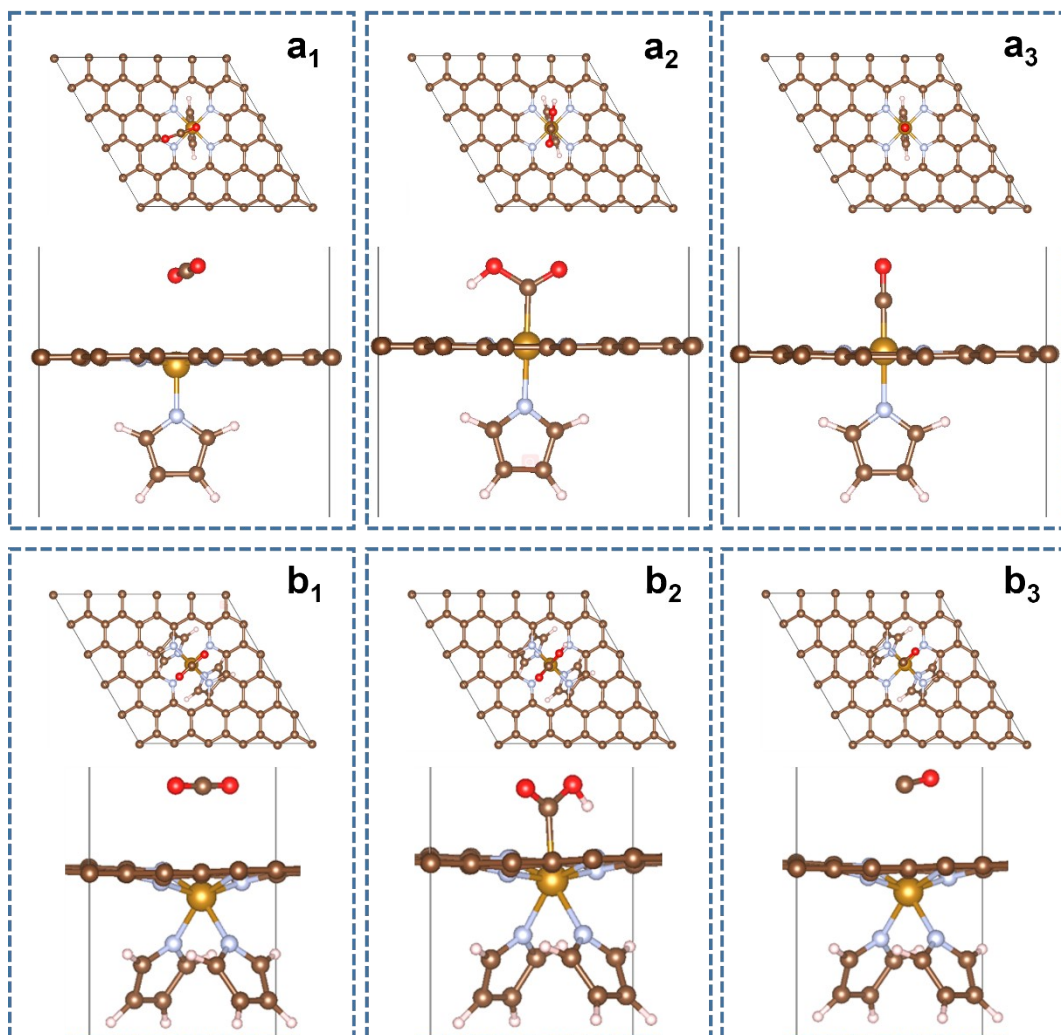

**Figure S33.** Optimized structures of FeN<sub>5</sub> and FeN<sub>6</sub> with adsorbed (a<sub>1</sub>, b<sub>1</sub>) \*CO<sub>2</sub>, (a<sub>2</sub>, b<sub>2</sub>) \*COOH, (a<sub>3</sub>, b<sub>3</sub>) \*CO.

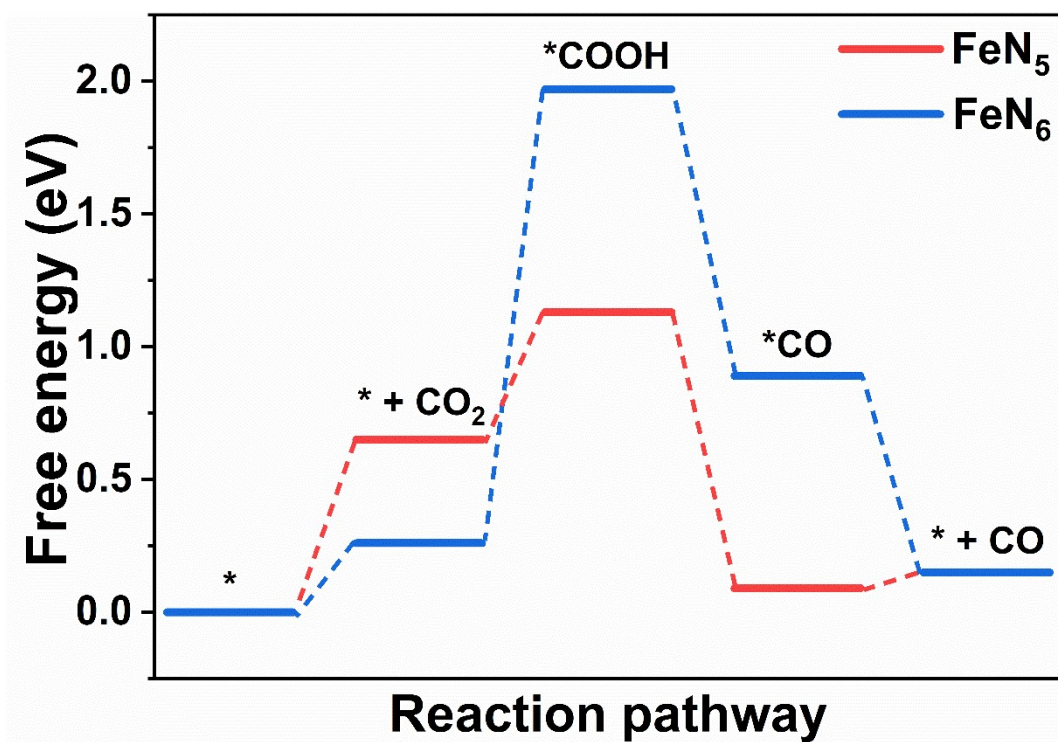

**Figure S34.** Calculated Gibbs free energy diagrams for CO<sub>2</sub> electroreduction to CO over FeN<sub>5</sub> and FeN<sub>6</sub> (vacuum condition).

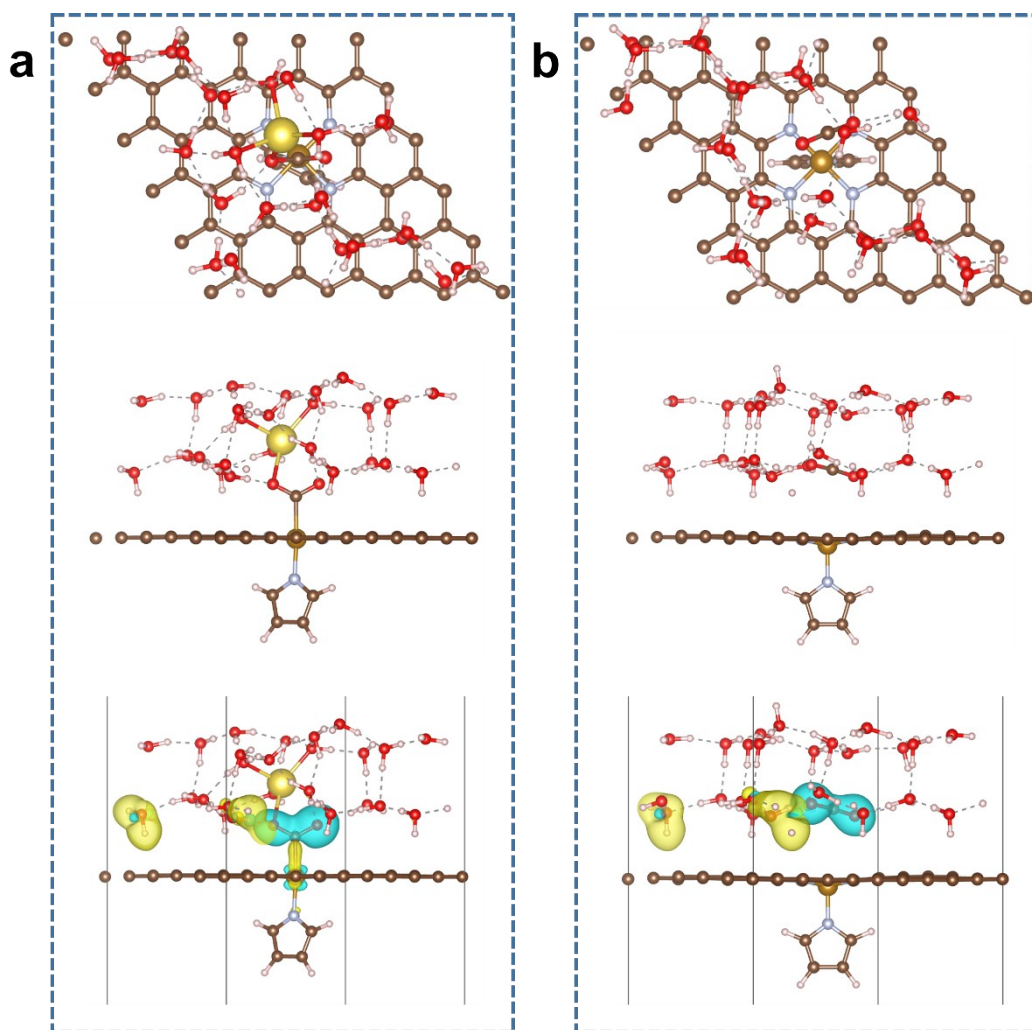

**Figure S35.** The top, side and charge density difference view of FeN<sub>5</sub> with adsorbed \*CO<sub>2</sub> in different condition. (a) Na<sup>+</sup> and (b) pure water.



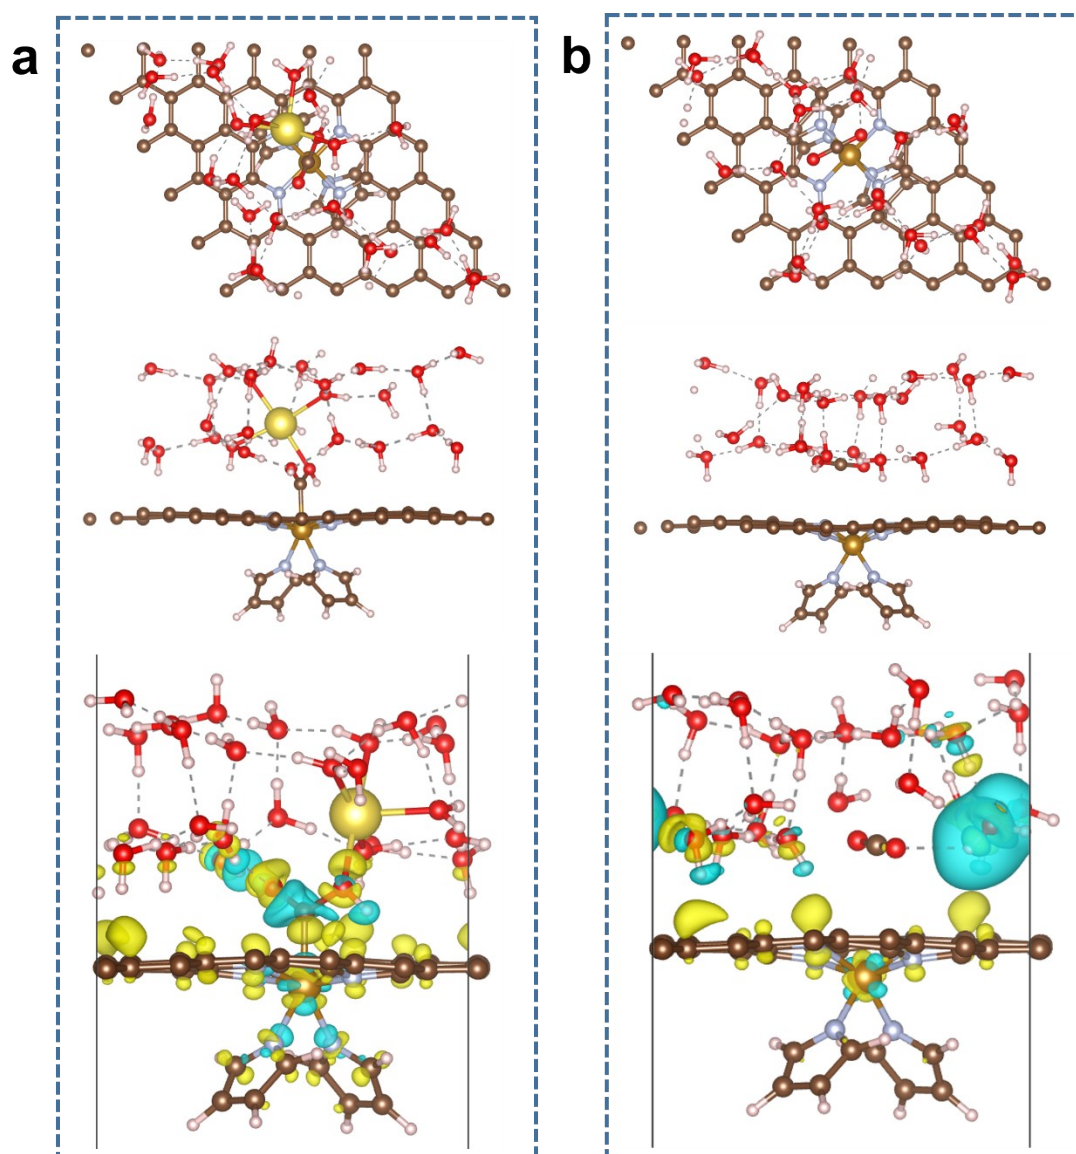

**Figure S36.** The top, side and charge density difference view of FeN<sub>6</sub> with adsorbed \*COOH in different condition. (a) Na<sup>+</sup> and (b) pure water.

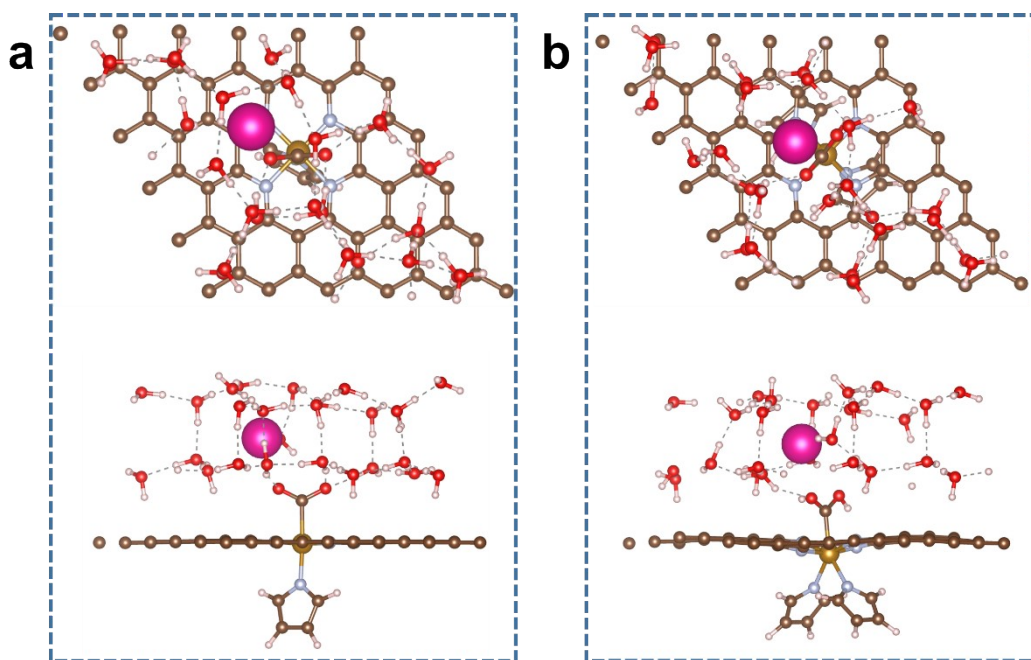

**Figure S37.** The top and side view of (a) FeN<sub>5</sub> with adsorbed \*CO<sub>2</sub> in Rb<sup>+</sup> and (b) FeN<sub>6</sub> with adsorbed \*COOH in Rb<sup>+</sup>.

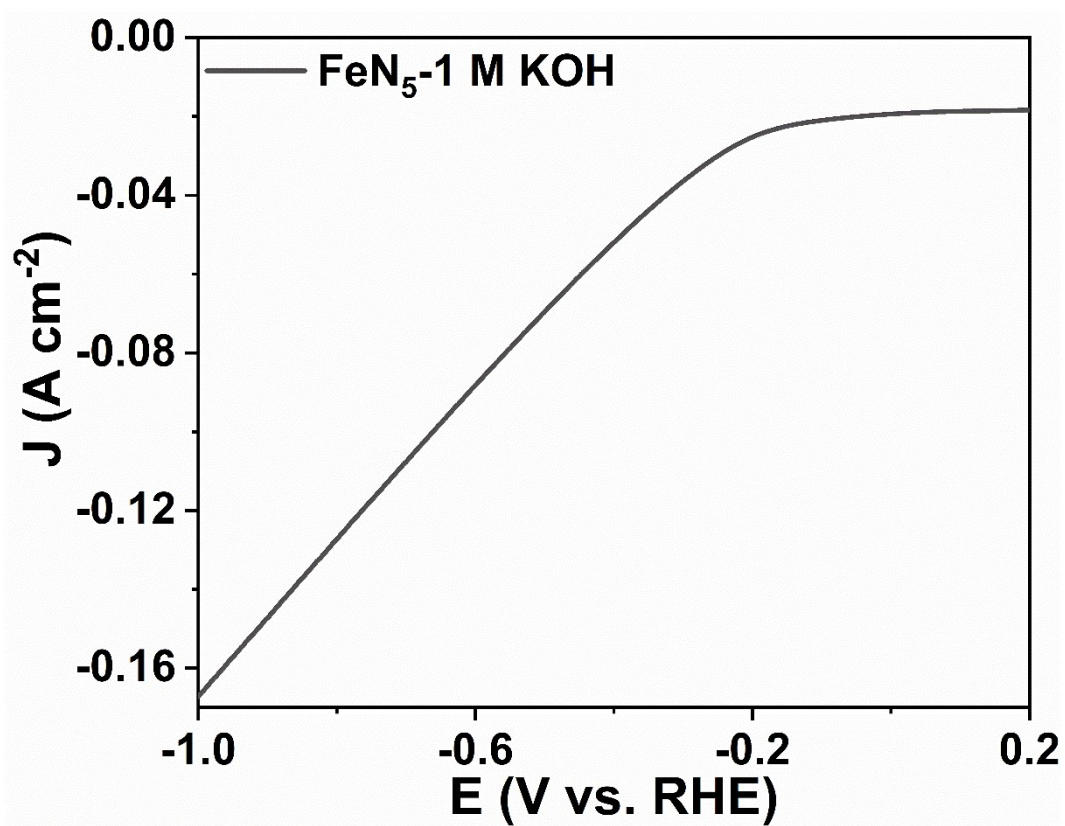

Figure S38. The LSV curve of FeN<sub>5</sub> under flow cell condition, 1 M KOH.

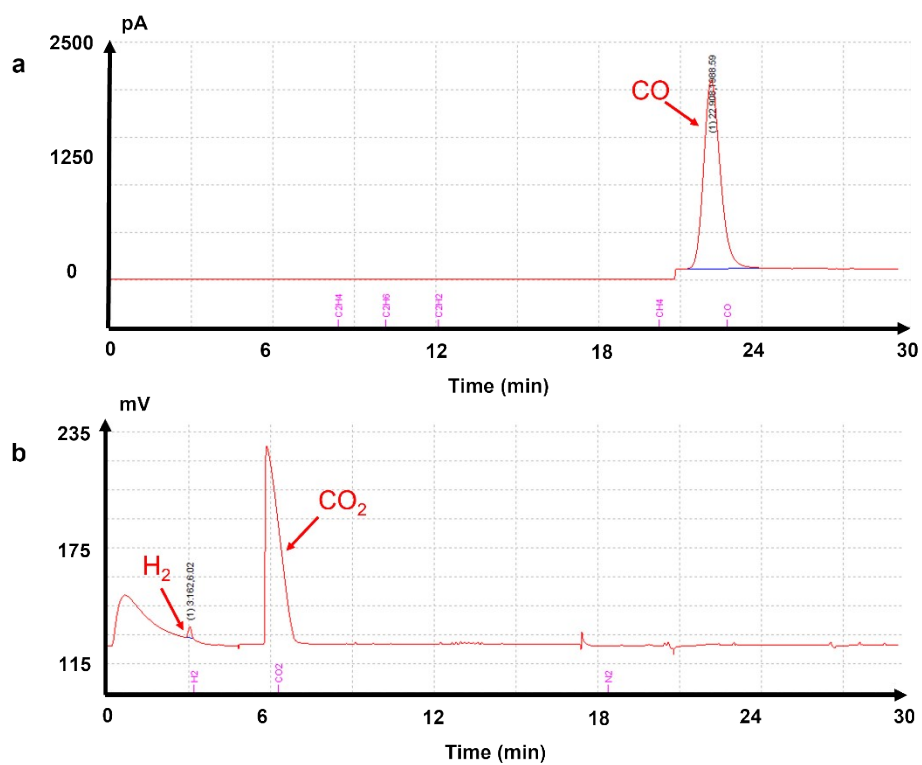

**Figure S39.** The GC of FeN<sub>5</sub> in CO<sub>2</sub> atmosphere (1 M NaOH, 100 mA cm<sup>-2</sup>). (a) The FID curve. (b) The TCD curve.

**Table S1.** The BET results of different Fe SAC.

| <b>Sample</b>                        | <b>FeN<sub>6</sub></b> | <b>FeN<sub>5</sub></b> |
|--------------------------------------|------------------------|------------------------|
| S <sub>BET</sub> / m <sup>2</sup> /g | 766.5351               | 922.5563               |
| Pore Volume / cm <sup>3</sup> /g     | 1.837236               | 1.910247               |
| Pore Size / nm                       | 9.5872                 | 8.2824                 |

**Table S2.** The elements' content of different Fe SAC. The atom ratio and weight ratio were measured by XPS and ICP-AES respectively.

| <b>Sample</b> | <b>FeN<sub>6</sub></b> | <b>FeN<sub>5</sub></b> |
|---------------|------------------------|------------------------|
| C (at%)       | 82.32%                 | 88.57%                 |
| O (at%)       | 10.07%                 | 4.72%                  |
| N (at%)       | 7.26%                  | 6.22%                  |
| Fe (at%)      | 0.35%                  | 0.49%                  |
| Fe (wt%)      | 1.90%                  | 2.18%                  |

**Table S3.** EXAFS fitting parameters at the Fe K-edge. ( $S_0^2=0.73$ )

| Sample           | Path   | C.N.    | R (Å)     | $\sigma^2 \times 10^{-3}$ (Å <sup>2</sup> ) | $\Delta E$ (eV) | R factor |
|------------------|--------|---------|-----------|---------------------------------------------|-----------------|----------|
| Fe foil          | Fe-Fe  | 8*      | 2.47±0.01 | 4.9±1.6                                     | -2.9±2.4        | 0.008    |
|                  | Fe-Fe  | 6*      | 2.85±0.01 | 5.6±2.7                                     | -3.3±3.8        |          |
| FeN <sub>6</sub> | Fe-N/O | 6.0±0.7 | 2.01±0.01 | 7.1±2.0                                     | -0.6±1.1        | 0.018    |
| FeN <sub>5</sub> | Fe-N/O | 5.5±0.5 | 2.01±0.01 | 7.3±1.6                                     | -0.4±0.9        | 0.012    |

C.N.: coordination numbers; R: bond distance;  $\sigma^2$ : Debye-Waller factors;  $\Delta E$ : the inner potential correction. R factor: goodness of fit. \* Fitting with fixed parameter.

The obtained XAFS data was processed in Athena (version 0.9.26) for background, pre-edge line and post-edge line calibrations. Then Fourier transformed fitting was carried out in Artemis (version 0.9.26). The  $k^2$  weighting,  $k$ -range of 3 – ~12 Å<sup>-1</sup> and R range of 1 - ~3 Å were used for the fitting of standards;  $k$ -range of 2 – ~10 Å<sup>-1</sup> and R range of 1 - ~3 Å were used for Fe samples. The four parameters, coordination number, bond length, Debye-Waller factor and  $E_0$  shift (CN, R,  $\sigma^2$ ,  $\Delta E_0$ ) were fitted without anyone was fixed, constrained, or correlated. For Wavelet Transform analysis, the  $\chi(k)$  exported from Athena was imported into the Hama Fortran code. The parameters were listed as follow: R range, 1 - 4 Å,  $k$  range, 0 - 13 Å<sup>-1</sup> for standards and 0 - 11 Å<sup>-1</sup> for Fe samples;  $k$  weight, 2; and Morlet function with  $\kappa=10$ ,  $\sigma=1$  was used as the mother wavelet to provide the overall distribution.



**Table S4.** Different kinds of N content based on high-resolution N element XPS result.

| <b>Sample</b> | <b>FeN<sub>6</sub></b> | <b>FeN<sub>5</sub></b> |
|---------------|------------------------|------------------------|
| Pyridinic N   | 33.82%                 | 31.04%                 |
| Fe-N          | 6.61%                  | 15.23%                 |
| Pyrrolic N    | 23.03%                 | 4.49%                  |
| Graphitic N   | 28.56%                 | 42.46%                 |
| Oxidized N    | 7.98%                  | 7.09%                  |

**Table S5.** Different valence of Fe content of Fe SAC (calculated from XPS).

| <b>Sample</b>    | <b>FeN<sub>6</sub></b> | <b>FeN<sub>5</sub></b> |
|------------------|------------------------|------------------------|
| Fe <sup>2+</sup> | 57.87%                 | 63.35%                 |
| Fe <sup>3+</sup> | 42.13%                 | 36.65%                 |

**Table S6.** The pH of different electrolyte.

| <b>Electrolyte</b>                     | <b>Before saturate CO<sub>2</sub></b> | <b>After saturate CO<sub>2</sub></b> | <b>After saturate Ar</b> |
|----------------------------------------|---------------------------------------|--------------------------------------|--------------------------|
| 0.1 M NaHCO <sub>3</sub>               | 8.28                                  | 6.62                                 | None                     |
| 0.1 M KHCO <sub>3</sub>                | 8.77                                  | 6.65                                 | None                     |
| 0.05 M Rb <sub>2</sub> CO <sub>3</sub> | 11.37                                 | 6.62                                 | 8.87                     |
| 0.3 M NaHCO <sub>3</sub>               | 8.11                                  | 7.08                                 | None                     |
| 0.3 M KHCO <sub>3</sub>                | 8.46                                  | 7.15                                 | None                     |
| 0.15 M Rb <sub>2</sub> CO <sub>3</sub> | 11.45                                 | 7.09                                 | 8.82                     |
| 0.5 M NaHCO <sub>3</sub>               | 8.00                                  | 7.26                                 | None                     |
| 0.5 M KHCO <sub>3</sub>                | 8.37                                  | 7.31                                 | None                     |
| 0.25 M Rb <sub>2</sub> CO <sub>3</sub> | 11.53                                 | 7.34                                 | 9.11                     |

T=298K

**Table S7.** The pH of different electrolyte (constant  $\text{HCO}_3^-$  concentration, change  $\text{Na}^+$  concentration).

| <b><math>\text{NaHCO}_3</math></b> | <b><math>\text{NaClO}_4</math></b> | <b>pH</b> |
|------------------------------------|------------------------------------|-----------|
| 0.1 M                              | 0 M                                | 6.62      |
| 0.1 M                              | 0.2 M                              | 6.62      |
| 0.1 M                              | 0.4 M                              | 6.62      |

**Table S8.** The pH of different electrolyte (constant Na<sup>+</sup> concentration, change HCO<sub>3</sub><sup>-</sup> concentration).

| <b>NaHCO<sub>3</sub></b> | <b>NaClO<sub>4</sub></b> | <b>pH</b> |
|--------------------------|--------------------------|-----------|
| 0.5 M                    | 0 M                      | 7.26      |
| 0.3 M                    | 0.2 M                    | 7.15      |
| 0.1 M                    | 0.4 M                    | 6.62      |

**Table S9.** The pH of different electrolyte (constant  $\text{HCO}_3^-$  concentration, change  $\text{K}^+$  concentration).

| <b><math>\text{KHCO}_3</math></b> | <b><math>\text{K}_2\text{SO}_4</math></b> | <b>pH</b> |
|-----------------------------------|-------------------------------------------|-----------|
| 0.1 M                             | 0 M                                       | 6.65      |
| 0.1 M                             | 0.1 M                                     | 6.65      |
| 0.1 M                             | 0.2 M                                     | 6.65      |

**Table S10.** The pH of different electrolyte (constant  $K^+$  concentration, change  $HCO_3^-$  concentration).

| <b>KHCO<sub>3</sub></b> | <b>K<sub>2</sub>SO<sub>4</sub></b> | <b>pH</b> |
|-------------------------|------------------------------------|-----------|
| 0.5 M                   | 0 M                                | 7.31      |
| 0.3 M                   | 0.1 M                              | 7.15      |
| 0.1 M                   | 0.2 M                              | 6.65      |



**Table S11.** The pH of different electrolyte (constant  $\text{HCO}_3^-$  concentration, change  $\text{Rb}^+$  concentration).

| <b><math>\text{Rb}_2\text{CO}_3</math></b> | <b><math>\text{Rb}_2\text{SO}_4</math></b> | <b>pH (after saturate <math>\text{CO}_2</math>)</b> |
|--------------------------------------------|--------------------------------------------|-----------------------------------------------------|
| 0.05 M                                     | 0 M                                        | 6.62                                                |
| 0.05 M                                     | 0.1 M                                      | 6.62                                                |
| 0.05 M                                     | 0.2 M                                      | 6.62                                                |

**Table S12.** The pH of different electrolyte (constant  $\text{Rb}^+$  concentration, change  $\text{HCO}_3^-$  concentration).

| <b><math>\text{Rb}_2\text{CO}_3</math></b> | <b><math>\text{Rb}_2\text{SO}_4</math></b> | <b>pH (after saturate <math>\text{CO}_2</math>)</b> |
|--------------------------------------------|--------------------------------------------|-----------------------------------------------------|
| 0.25 M                                     | 0 M                                        | 7.34                                                |
| 0.15 M                                     | 0.1 M                                      | 7.09                                                |
| 0.05 M                                     | 0.2 M                                      | 6.62                                                |

**Table S13.** The formation energy of two different FeN<sub>5</sub> structure ( $E_{\text{for}} = E_{\text{total}} - E_{\text{sub}} - E_{\text{mol}}$ , the lower  $E_{\text{for}}$  represent the more stable structure).

| <b>FeN<sub>5</sub> configuration</b> | <b>E<sub>for</sub> (eV)</b> |
|--------------------------------------|-----------------------------|
| FeN <sub>4</sub> + pyrrolic N        | -2.10                       |
| FeN <sub>4</sub> + pyridinic N       | -0.97                       |

**Table S14.** The adsorption energy of \*CO<sub>2</sub> adsorbed on FeN<sub>5</sub> and \*COOH adsorbed on FeN<sub>6</sub> under different cation condition.

| <b>Solution condition</b> | <b>FeN<sub>5</sub> - *CO<sub>2</sub></b> | <b>FeN<sub>6</sub> - *COOH</b> |
|---------------------------|------------------------------------------|--------------------------------|
| Pure water                | -16.72 eV                                | -19.73 eV                      |
| Na <sup>+</sup>           | -18.06 eV                                | -21.30 eV                      |
| Rb <sup>+</sup>           | -19.11 eV                                | -23.62 eV                      |

**Table S15.** The bond length between H atom in H<sub>2</sub>O and O atom in intermediates.

| <b>Intermediate</b>                 | <b>Na<sup>+</sup></b> | <b>Rb<sup>+</sup></b> |
|-------------------------------------|-----------------------|-----------------------|
| FeN <sub>5</sub> - *CO <sub>2</sub> | 1.69 Å                | 1.82 Å                |
| FeN <sub>6</sub> - *COOH            | 1.74 Å                | 1.90 Å                |

## Reference

- (1)Liu, X.-C.; Wei, C.; Wu, Y.; Fang, Y.; Li, W.-Q.; Ding, R.-R.; Wang, G.; Mu, Y. *ACS Catal.* **2021**, *11*, 14986-14994.
- (2)Pei, J.; Wang, T.; Sui, R.; Zhang, X.; Zhou, D.; Qin, F.; Zhao, X.; Liu, Q.; Yan, W.; Dong, J.; Zheng, L.; Li, A.; Mao, J.; Zhu, W.; Chen, W.; Zhuang, Z. *Energy Environ. Sci.* **2021**, *14*, 3019-3028.
